# Supplementary material
Source: bioRxiv or medRxiv preprint supplement (https://www.biorxiv.org/highwire/filestream/115354/field_highwire_adjunct_files/0/380311-1.pdf)
Supplement: Supplementary file [file 380311-1.pdf]

| 617 Proteins     | Gene name                                                                                       | MW kDa | Matching peptides | Cov. %                                                                                                     | Description - Species                                    |
|------------------|-------------------------------------------------------------------------------------------------|--------|-------------------|------------------------------------------------------------------------------------------------------------|----------------------------------------------------------|
| B81R1_DANRE      | pdcd6ip {ECO:0000313 Ensembl:ENSADARP00000121990, ths1 {ECO:0000313 Ensembl:ENSADARP0000072597, | 95,8   | 271, 4            | 64                                                                                                         | 55,7 Uncharacterized protein <a href="#">Danio rerio</a> |
| F1R4B4_DANRE     | thn1                                                                                            | 270,6  | 52                | 26,5 Talin 1 <a href="#">Danio rerio</a>                                                                   |                                                          |
| Q5U7N6_DANRE     | myh9b {ECO:0000313 Ensembl:ENSADARP00000114437,                                                 | 196,3  | 50                | 34,3 Uncharacterized protein <a href="#">Danio rerio</a>                                                   |                                                          |
| F1Q1K4_DANRE     | mfge8b {ECO:0000313 Ensembl:ENSADARP00000067323,                                                | 52,3   | 45                | 63,4 Milk fat globule-EGF factor 8 protein <a href="#">Danio rerio</a>                                     |                                                          |
| AZRR21_DANRE     | phex {ECO:0000313 Ensembl:ENSADARP00000107273,                                                  | 83,8   | 41                | 57,6 Uncharacterized protein <a href="#">Danio rerio</a>                                                   |                                                          |
| F1R7D5_DANRE     | fn1a {ECO:0000313 Ensembl:ENSADARP00000112231,                                                  | 272,0  | 40                | 21,7 Uncharacterized protein <a href="#">Danio rerio</a>                                                   |                                                          |
| B05602_DANRE     | hsp8b                                                                                           | 71,2   | 38                | 54,2 Heat shock cognate 71 kDa protein <a href="#">Danio rerio</a>                                         |                                                          |
| Q6N1Y4_DANRE     | igsf3 {ECO:0000313 ZFIN:ZDB-GENE-070912-243}                                                    | 113,4  | 36                | 38,8 Uncharacterized protein <a href="#">Danio rerio</a>                                                   |                                                          |
| N9NMM4_DANRE     | atp1a1                                                                                          | 117,0  | 36                | 38,1 ATPase, Na+/K+ transporting, alpha 1 polypeptide <a href="#">Danio rerio</a>                          |                                                          |
| Q9DGL6_DANRE     | mmp9 {ECO:0000313 Ensembl:ENSADARP00000062844,                                                  | 76,6   | 31                | 44,9 Uncharacterized protein <a href="#">Danio rerio</a>                                                   |                                                          |
| F1QC76_DANRE     | dip2ba                                                                                          | 171,7  | 31                | 24,2 Disco-interacting protein 2 homolog B-A <a href="#">Danio rerio</a>                                   |                                                          |
| D128A_DANRE      | thbs1b {ECO:0000313 Ensembl:ENSADARP00000120705,                                                | 130,0  | 30                | 24,3 Uncharacterized protein <a href="#">Danio rerio</a>                                                   |                                                          |
| F1QL35_DANRE     | ctnna1                                                                                          | 100,5  | 29                | 40,5 Catenin (Cadherin-associated protein), alpha <a href="#">Danio rerio</a>                              |                                                          |
| Q9P9F8_DANRE     | eef2b                                                                                           | 95,5   | 28                | 35,8 Eukaryotic translation elongation factor 2 <a href="#">Danio rerio</a>                                |                                                          |
| Q6P315_DANRE     | lam1b1b {ECO:0000313 Ensembl:ENSADARP00000066944,                                               | 197,7  | 28                | 19,4 Uncharacterized protein <a href="#">Danio rerio</a>                                                   |                                                          |
| F1R1E9_DANRE     | abcc6a {ECO:0000313 ZFIN:ZDB-GENE-050517-18}                                                    | 169,0  | 28                | 21,9 Uncharacterized protein <a href="#">Danio rerio</a>                                                   |                                                          |
| E7E118_DANRE     | actba                                                                                           | 41,8   | 27                | 64,3 Actin, cytoplasmic 1 <a href="#">Danio rerio</a>                                                      |                                                          |
| ACT81_DANRE      | tuba1c                                                                                          | 50,2   | 27                | 62,1 Uncharacterized protein <a href="#">Danio rerio</a>                                                   |                                                          |
| B8A518_DANRE     | tuba1a                                                                                          | 50,1   | 27                | 62,1 Tubulin protein <a href="#">Danio rerio</a>                                                           |                                                          |
| Q6NWK7_DANRE     | slc12i11-114n24.6                                                                               | 50,1   | 27                | 62,3 Uncharacterized protein <a href="#">Danio rerio</a>                                                   |                                                          |
| MVP_DANRE        | mvp {ECO:0000313 Ensembl:ENSADARP00000112736,                                                   | 96,5   | 27                | 36 Major vault protein <a href="#">Danio rerio</a>                                                         |                                                          |
| E9Q6Q6_DANRE     | cltca {ECO:0000313 Ensembl:ENSADARP00000063848,                                                 | 97,3   | 26                | 34,4 Major vault protein <a href="#">Danio rerio</a>                                                       |                                                          |
| F1R966_DANRE     | flna {ECO:0000313 Ensembl:ENSADARP00000113808,                                                  | 191,8  | 26                | 19,9 Clathrin heavy chain <a href="#">Danio rerio</a>                                                      |                                                          |
| E9Q162_DANRE     | hspg2 {ECO:0000313 Ensembl:ENSADARP00000104137,                                                 | 272,6  | 26                | 13,2 Uncharacterized protein <a href="#">Danio rerio</a>                                                   |                                                          |
| F1R5K7_DANRE     | tuba814                                                                                         | 370,0  | 26                | 10,1 Uncharacterized protein <a href="#">Danio rerio</a>                                                   |                                                          |
| Q6N1W5_DANRE     | lama4 {ECO:0000313 Ensembl:ENSADARP0000006065,                                                  | 50,0   | 25                | 57,1 Tubulin alpha 6 <a href="#">Danio rerio</a>                                                           |                                                          |
| F1Q1U0_DANRE     | lamc1                                                                                           | 207,5  | 25                | 17,5 Uncharacterized protein <a href="#">Danio rerio</a>                                                   |                                                          |
| LAMC1_DANRE      | tuba813                                                                                         | 176,2  | 25                | 21 Laminin subunit gamma-1 <a href="#">Danio rerio</a>                                                     |                                                          |
| Q6DC49_DANRE     | tuba1b                                                                                          | 50,1   | 24                | 54,9 Tubulin alpha 8-like 3a protein <a href="#">Danio rerio</a>                                           |                                                          |
| B8A516_DANRE     | tuba1b                                                                                          | 50,0   | 24                | 53,7 Uncharacterized protein <a href="#">Danio rerio</a>                                                   |                                                          |
| E9Q8V1_DANRE     | cltcb                                                                                           | 191,6  | 23                | 16,4 Clathrin heavy chain <a href="#">Danio rerio</a>                                                      |                                                          |
| F1QE65_DANRE     | cyfp1 {ECO:0000313 Ensembl:ENSADARP00000065126,                                                 | 145,2  | 23                | 21,9 Cytoplasmic FMRI-interacting protein 1 homolog <a href="#">Danio rerio</a>                            |                                                          |
| Q6P6X4_DANRE     | hsc70                                                                                           | 70,9   | 22                | 31,4 Heat shock cognate 71 kDa protein <a href="#">Danio rerio</a>                                         |                                                          |
| E7E177_DANRE     | slc17c3-199e17.1 {ECO:0000313 Ensembl:ENSADARP00000093488,                                      | 49,8   | 22                | 47 Uncharacterized protein <a href="#">Danio rerio</a>                                                     |                                                          |
| HS90B_DANRE      | hsp90ab1                                                                                        | 83,4   | 22                | 33,8 Heat shock protein HSP 90-beta <a href="#">Danio rerio</a>                                            |                                                          |
| F1R9V3_DANRE     | hspa8l                                                                                          | 71,1   | 22                | 30,6 Uncharacterized protein <a href="#">Danio rerio</a>                                                   |                                                          |
| F1QK27_DANRE     | atp2b4 {ECO:0000313 Ensembl:ENSADARP00000109303,                                                | 129,8  | 21                | 22,2 Calcium-transporting ATPase <a href="#">Danio rerio</a>                                               |                                                          |
| E7F2N2_DANRE     | BX005410.2 {ECO:0000313 Ensembl:ENSADARP00000107543}                                            | 109,8  | 21                | 22,6 Uncharacterized protein <a href="#">Danio rerio</a>                                                   |                                                          |
| Q6N1W9_DANRE     | tubb5                                                                                           | 49,7   | 20                | 54,3 Tubulin, beta 5 <a href="#">Danio rerio</a>                                                           |                                                          |
| F1Q6P3_DANRE     | col6a1 {ECO:0000313 Ensembl:ENSADARP00000103794,                                                | 108,1  | 20                | 23,2 Uncharacterized protein (Fragment) <a href="#">Danio rerio</a>                                        |                                                          |
| E7F1A_DANRE      | etf1                                                                                            | 60,0   | 20                | 60,4 Elongation factor 1-alpha <a href="#">Danio rerio</a>                                                 |                                                          |
| Q6P5M9_DANRE     | tubb4b                                                                                          | 49,8   | 19                | 53,3 Tubulin, beta 2c <a href="#">Danio rerio</a>                                                          |                                                          |
| Q6642_DANRE      | msna {ECO:0000313 Ensembl:ENSADARP00000017246,                                                  | 68,0   | 19                | 33,9 Radixin <a href="#">Danio rerio</a>                                                                   |                                                          |
| Q6P972_DANRE     | tuba2                                                                                           | 50,0   | 19                | 38,4 Tubulin, alpha 2 <a href="#">Danio rerio</a>                                                          |                                                          |
| F1R074_DANRE     | agrn {ECO:0000313 Ensembl:ENSADARP00000101095,                                                  | 193,0  | 19                | 12,8 Uncharacterized protein (Fragment) <a href="#">Danio rerio</a>                                        |                                                          |
| Q6I0J2_DANRE     | zgc:55461                                                                                       | 49,8   | 18                | 47,4 Uncharacterized protein <a href="#">Danio rerio</a>                                                   |                                                          |
| Q669W2_DANRE     | ehd1b {ECO:0000313 Ensembl:ENSADARP00000020181,                                                 | 60,0   | 18                | 42,1 EH-domain containing 1 <a href="#">Danio rerio</a>                                                    |                                                          |
| ID5A3_DANRE      | myh10 {ECO:0000313 Ensembl:ENSADARP00000125771,                                                 | 230,5  | 18                | 9,1 Uncharacterized protein <a href="#">Danio rerio</a>                                                    |                                                          |
| TERA_DANRE       | vcp                                                                                             | 89,4   | 18                | 29,3 Transitional endoplasmic reticulum ATPase <a href="#">Danio rerio</a>                                 |                                                          |
| F1QK88_DANRE     | col6a3 {ECO:0000313 Ensembl:ENSADARP00000123601,                                                | 405,9  | 18                | 5,9 Uncharacterized protein (Fragment) <a href="#">Danio rerio</a>                                         |                                                          |
| F1R4K1_DANRE     | wu:ff41e11                                                                                      | 49,6   | 17                | 46,6 Uncharacterized protein <a href="#">Danio rerio</a>                                                   |                                                          |
| F1R6V8_DANRE     | tubb4b {ECO:0000313 Ensembl:ENSADARP00000119055,                                                | 49,8   | 17                | 43,4 Uncharacterized protein <a href="#">Danio rerio</a>                                                   |                                                          |
| E9Q0B1_DANRE     | tms2a {ECO:0000313 ZFIN:ZDB-GENE-090312-163}                                                    | 175,2  | 17                | 13,2 Uncharacterized protein <a href="#">Danio rerio</a>                                                   |                                                          |
| F1QC12_DANRE     | pcarb2 {ECO:0000313 ZFIN:ZDB-GENE-090311-6}                                                     | 206,4  | 17                | 20,4 Uncharacterized protein (Fragment) <a href="#">Danio rerio</a>                                        |                                                          |
| B81K8_DANRE      | itgav {ECO:0000313 Ensembl:ENSADARP00000044313,                                                 | 115,1  | 16                | 21,5 Uncharacterized protein <a href="#">Danio rerio</a>                                                   |                                                          |
| F1RCA1_DANRE     | uba1 {ECO:0000313 Ensembl:ENSADARP00000054690,                                                  | 118,2  | 16                | 19,9 Uncharacterized protein <a href="#">Danio rerio</a>                                                   |                                                          |
| Q80316_DANRE     | sdcbp2 {ECO:0000313 Ensembl:ENSADARP00000016087,                                                | 32,4   | 15                | 50,5 Sdcbp protein <a href="#">Danio rerio</a>                                                             |                                                          |
| Q6P0V8_DANRE     | anxa5b {ECO:0000313 EMBL:AAH5430.1,                                                             | 35,1   | 15                | 59,3 Annexin <a href="#">Danio rerio</a>                                                                   |                                                          |
| F1QKX8_DANRE     | tubb2 {ECO:0000313 ZFIN:ZDB-GENE-050522-384}                                                    | 50,5   | 15                | 37,1 Uncharacterized protein <a href="#">Danio rerio</a>                                                   |                                                          |
| Q7ZV15_DANRE     | serpine2 {ECO:0000313 EMBL:AAH54598.1,                                                          | 43,8   | 15                | 50,1 Serine (Or cysteine) proteinase inhibitor, clade E (Nexin, plasminogen activator inhibitor type 1), r |                                                          |
| RAP1B_DANRE      | rap1b                                                                                           | 20,8   | 15                | 67,4 Ras-related protein Rap-1b <a href="#">Danio rerio</a>                                                |                                                          |
| Q6P0S5_DANRE     | tuba812                                                                                         | 50,2   | 15                | 37,2 Tubulin, alpha 8 like 2 <a href="#">Danio rerio</a>                                                   |                                                          |
| F1RCB6_DANRE     | zgc:86725 {ECO:0000313 Ensembl:ENSADARP00000100195,                                             | 42,0   | 15                | 34,5 Uncharacterized protein <a href="#">Danio rerio</a>                                                   |                                                          |
| Q088V6_DANRE     | ckba {ECO:0000313 Ensembl:ENSADARP00000015917,                                                  | 42,9   | 15                | 40,9 Uncharacterized protein <a href="#">Danio rerio</a>                                                   |                                                          |
| F1R889_DANRE     | myh9a {ECO:0000313 Ensembl:ENSADARP00000096003,                                                 | 227,3  | 15                | 8,2 Uncharacterized protein (Fragment) <a href="#">Danio rerio</a>                                         |                                                          |
| F1Q209_DANRE     | aclya {ECO:0000313 Ensembl:ENSADARP00000044161,                                                 | 119,7  | 15                | 19,9 Uncharacterized protein <a href="#">Danio rerio</a>                                                   |                                                          |
| F1Q8C0_DANRE     | pknox2a {ECO:0000313 Ensembl:ENSADARP00000048820,                                               | 210,1  | 15                | 10 Uncharacterized protein <a href="#">Danio rerio</a>                                                     |                                                          |
| A0A0G219T4_DANRE | -                                                                                               | 213,7  | 15                | 11,4 Uncharacterized protein <a href="#">Danio rerio</a>                                                   |                                                          |
| Q6TNP9_DANRE     | tuba8l                                                                                          | 50,0   | 14                | 29,8 Tubulin, alpha 2 <a href="#">Danio rerio</a>                                                          |                                                          |
| F1Q7R1_DANRE     | itgb5 {ECO:0000313 Ensembl:ENSADARP0000002532,                                                  | 88,9   | 14                | 26,4 Integrin beta <a href="#">Danio rerio</a>                                                             |                                                          |
| F1QV22_DANRE     | actn1 {ECO:0000313 Ensembl:ENSADARP000000110976,                                                | 103,9  | 14                | 17,5 Uncharacterized protein <a href="#">Danio rerio</a>                                                   |                                                          |
| NCKP1_DANRE      | nckap1                                                                                          | 128,7  | 14                | 12,3 Nck-associated protein 1 <a href="#">Danio rerio</a>                                                  |                                                          |
| Q6P6Q3_DANRE     | anxa2a {ECO:0000313 EMBL:AAH62531.1,                                                            | 38,1   | 13                | 41,2 Annexin <a href="#">Danio rerio</a>                                                                   |                                                          |
| Q8MGT7_DANRE     | anxa4 {ECO:0000313 EMBL:AAH54622.1,                                                             | 45,6   | 13                | 45,8 Annexin <a href="#">Danio rerio</a>                                                                   |                                                          |
| HTR1A_DANRE      | htra1a                                                                                          | 51,4   | 13                | 35,9 Serine protease HTRA1A <a href="#">Danio rerio</a>                                                    |                                                          |
| B05610_DANRE     | hsp70l                                                                                          | 70,5   | 13                | 20,5 Novel protein similar to heat shock cognate 70-kd protein <a href="#">Danio rerio</a>                 |                                                          |
| Q6P317_DANRE     | ehd2b {ECO:0000313 ZFIN:ZDB-GENE-030131-9347}                                                   | 61,4   | 13                | 33,9 EH-domain containing 2 <a href="#">Danio rerio</a>                                                    |                                                          |
| E7W2J5_DANRE     | itga4 {ECO:0000313 Ensembl:ENSADARP00000124706,                                                 | 78,7   | 13                | 20,2 Uncharacterized protein <a href="#">Danio rerio</a>                                                   |                                                          |
| E7F767_DANRE     | slc17c3-24477.4 {ECO:0000313 Ensembl:ENSADARP00000103995,                                       | 139,1  | 13                | 11,5 Uncharacterized protein <a href="#">Danio rerio</a>                                                   |                                                          |
| F6N9G0_DANRE     | pcarb2 {ECO:0000313 Ensembl:ENSADARP00000122802,                                                | 88,8   | 13                | 25,7 Uncharacterized protein <a href="#">Danio rerio</a>                                                   |                                                          |
| F1R4S1_DANRE     | itgb4 {ECO:0000313 Ensembl:ENSADARP00000031533}                                                 | 210,6  | 13                | 8,3 Integrin beta <a href="#">Danio rerio</a>                                                              |                                                          |
| Q804H2_DANRE     | anxa1a {ECO:0000313 Ensembl:ENSADARP00000028837,                                                | 37,8   | 13                | 35,6 Annexin <a href="#">Danio rerio</a>                                                                   |                                                          |
| F1Q9R5_DANRE     | steap4 {ECO:0000313 Ensembl:ENSADARP00000118847,                                                | 53,1   | 12                | 27,8 Uncharacterized protein <a href="#">Danio rerio</a>                                                   |                                                          |
| E7F814_DANRE     | zgc:56630                                                                                       | 21,0   | 12                | 51,4 Uncharacterized protein <a href="#">Danio rerio</a>                                                   |                                                          |
| Q7T391_DANRE     | anxa11a {ECO:0000313 EMBL:AAH53208.1,                                                           | 51,4   | 12                | 28,2 Annexin <a href="#">Danio rerio</a>                                                                   |                                                          |
| F1Q6H7_DANRE     | ctnnb1 {ECO:0000313 Ensembl:ENSADARP00000032935,                                                | 85,6   | 12                | 21,3 Uncharacterized protein <a href="#">Danio rerio</a>                                                   |                                                          |
| F7F096_DANRE     | eeef1a1 {ECO:0000313 Ensembl:ENSADARP00000029296,                                               | 99,1   | 12                | 24,9 Elongation factor 1-alpha <a href="#">Danio rerio</a>                                                 |                                                          |
| E9Q6G9_DANRE     | trf1b {ECO:0000313 Ensembl:ENSADARP00000122583,                                                 | 85,4   | 12                | 18,7 Uncharacterized protein <a href="#">Danio rerio</a>                                                   |                                                          |
| Q5R12_DANRE      | hsp90aa1.2                                                                                      | 84,7   | 12                | 18,5 Heat shock protein 90-alpha 2 <a href="#">Danio rerio</a>                                             |                                                          |
| F1QNS2_DANRE     | bcam {ECO:0000313 Ensembl:ENSADARP00000105899,                                                  | 65,7   | 12                | 25,8 Uncharacterized protein <a href="#">Danio rerio</a>                                                   |                                                          |
| E7F8D5_DANRE     | iqgap1 {ECO:0000313 Ensembl:ENSADARP00000098704,                                                | 188,6  | 12                | 9,1 Uncharacterized protein <a href="#">Danio rerio</a>                                                    |                                                          |
| TEN3_DANRE       | tenn3                                                                                           | 288,6  | 12                | 6,4 Teneurin-3 <a href="#">Danio rerio</a>                                                                 |                                                          |
| Q6P3H9_DANRE     | slc3a2b {ECO:0000313 Ensembl:ENSADARP00000053796,                                               | 56,0   | 11                | 30,8 Uncharacterized protein <a href="#">Danio rerio</a>                                                   |                                                          |
| Q6N1W1_DANRE     | ehd1a {ECO:0000313 Ensembl:ENSADARP00000015404,                                                 | 60,2   | 11                | 25,7 Uncharacterized protein <a href="#">Danio rerio</a>                                                   |                                                          |
| E7FC99_DANRE     | ctnnb2 {ECO:0000313 Ensembl:ENSADARP00000076115,                                                | 81,5   | 11                | 20,5 Uncharacterized protein <a href="#">Danio rerio</a>                                                   |                                                          |
| ASPMG2_DANRE     | slc12i11-199o1.2                                                                                | 70,7   | 11                | 16,4 Uncharacterized protein <a href="#">Danio rerio</a>                                                   |                                                          |
| Q5TV97_DANRE     | ehd3                                                                                            | 60,8   | 11                | 22,8 Uncharacterized protein <a href="#">Danio rerio</a>                                                   |                                                          |
| Q6T6S5_DANRE     | tuba4l                                                                                          | 50,2   | 11                | 21,6 Alpha tubulin-like protein <a href="#">Danio rerio</a>                                                |                                                          |
| X1WDM1_DANRE     | ncam1a {ECO:0000313 Ensembl:ENSADARP00000128320,                                                | 92,1   | 11                | 18,2 Uncharacterized protein (Fragment) <a href="#">Danio rerio</a>                                        |                                                          |
| A0A0G219H1_DANRE | -                                                                                               | 68,4   | 11                | 11 Uncharacterized protein <a href="#">Danio rerio</a>                                                     |                                                          |
| E7FCV8_DANRE     | col6a2 {ECO:0000313 Ensembl:ENSADARP00000110121,                                                | 106,9  | 11                | 11,6 Uncharacterized protein <a href="#">Danio rerio</a>                                                   |                                                          |
| F1RC45_DANRE     | pdgfrb {ECO:0000313 Ensembl:ENSADARP00000028652,                                                | 99,5   | 11                | 15,3 Receptor protein-tyrosine kinase <a href="#">Danio rerio</a>                                          |                                                          |
| Q6P6C1_DANRE     | eno1a                                                                                           | 47,1   | 10                | 29,6 Enolase 1, (Alpha) <a href="#">Danio rerio</a>                                                        |                                                          |
| Q6TNT9_DANRE     | gdi2                                                                                            | 50,6   | 10                | 33,3 GDP dissociation inhibitor 2 <a href="#">Danio rerio</a>                                              |                                                          |
| VAT1_DANRE       | vat1 {ECO:0000312 EMBL:AAH64643.1}                                                              | 53,6   | 10                | 26,7 Synaptic vesicle membrane protein VAT-1 homolog <a href="#">Danio rerio</a>                           |                                                          |
| Q6PFU1_DANRE     | cd81a {ECO:0000313 ZFIN:ZDB-GENE-000831-5}                                                      | 26,2   | 10                | 33,9 Tetraspanin <a href="#">Danio rerio</a>                                                               |                                                          |
| B3D59_DANRE      | myh11a                                                                                          | 227,7  | 10                | 5,7 Myosin, heavy polypeptide 11, smooth muscle <a href="#">Danio rerio</a>                                |                                                          |
| F1Q6S8_DANRE     | itgb1a {ECO:0000313 Ensembl:ENSADARP00000039699,                                                | 88,6   | 10                | 15,2 Integrin beta <a href="#">Danio rerio</a>                                                             |                                                          |
| Q7T3L3_DANRE     | hsp90b1                                                                                         | 91,3   | 10                | 16,3 Chaperone protein GP96 <a href="#">Danio rerio</a>                                                    |                                                          |
| F1QV65_DANRE     | gpc1b {ECO:0000313 Ensembl:ENSADARP000000110282,                                                | 60,7   | 10                | 22,4 Uncharacterized protein <a href="#">Danio rerio</a>                                                   |                                                          |
| F1Q6B9_DANRE     | igsf8 {ECO:0000313 Ensembl:ENSADARP00000117426,                                                 | 68,0   | 10                | 19,8 Uncharacterized protein <a href="#">Danio rerio</a>                                                   |                                                          |
| E7F8B0_DANRE     | dip2bb {ECO:0000313 ZFIN:ZDB-GENE-100729-4}                                                     | 174,2  | 10                | 7,5 Uncharacterized protein <a href="#">Danio rerio</a>                                                    |                                                          |
| A0A0G219K1_DANRE | -                                                                                               | 502,7  | 10                | 2,5 Uncharacterized protein <a href="#">Danio rerio</a>                                                    |                                                          |
| E7F713_DANRE     | fasn {ECO:0000313 Ensembl:ENSADARP00000121001,                                                  | 273,6  | 10                | 6,1 Uncharacterized protein <a href="#">Danio rerio</a>                                                    |                                                          |
| B3D1T1_DANRE     | cyfp2 {ECO:0000313 Ensembl:ENSADARP00000124883,                                                 | 145,7  | 10                | 9,7 Uncharacterized protein <a href="#">Danio rerio</a>                                                    |                                                          |
| Q5SPR2_DANRE     | clu {ECO:0000313 Ensembl:ENSADARP00000110504,                                                   | 51,9   | 9                 | 33,9 Clusterin <a href="#">Danio rerio</a>                                                                 |                                                          |
| CTL2_DANRE       | slc44a2                                                                                         | 79,2   | 9                 | 17,8 Choline transporter-like protein 2 <a href="#">Danio rerio</a>                                        |                                                          |
| Q6T6N9_DANRE     | cpne1 {ECO:0000313 Ensembl:ENSADARP00000008206,                                                 | 59,2   | 9                 | 25,7 Copine III <a href="#">Danio rerio</a>                                                                |                                                          |
| AXCE51_DANRE     | eeef2 {ECO:0000313 Ensembl:ENSADARP00000051080,                                                 | 95,9   | 9                 | 11,8 Uncharacterized protein <a href="#">Danio rerio</a>                                                   |                                                          |
| Q81G86_DANRE     | eeef1a1 {ECO:0000313 Ensembl:ENSADARP000000100647,                                              | 99,2   | 9                 | 17,3 Lysosome membrane protein II <a href="#">Danio rerio</a>                                              |                                                          |
| AZAW1_DANRE      | prdx1 {ECO:0000313 Ensembl:ENSADARP00000116465,                                                 | 22,1   | 9                 | 55,3 Uncharacterized protein <a href="#">Danio rerio</a>                                                   |                                                          |
| E7F5N6_DANRE     | itga10 {ECO:0000313 Ensembl:ENSADARP00000013715,                                                | 130,3  | 9                 | 9,1 Uncharacterized protein <a href="#">Danio rerio</a>                                                    |                                                          |
| E9Q6E6_DANRE     | arf11 {ECO:0000313 Ensembl:ENSADARP00000114712,                                                 | 16,3   | 9                 | 75,7 Uncharacterized protein <a href="#">Danio rerio</a>                                                   |                                                          |
| Q568F0_DANRE     | eeef1a1b                                                                                        | 50,4   | 9                 | 17,7 Elongation factor 1-alpha <a href="#">Danio rerio</a>                                                 |                                                          |
| E7F123_DANRE     | BX005410.1 {ECO:0000313 Ensembl:ENSADARP00000053443}                                            | 109,4  | 9                 | 11,4 Uncharacterized protein <a href="#">Danio rerio</a>                                                   |                                                          |
| F1R140_DANRE     | vclt {ECO:0000313 Ensembl:ENSADARP00000100647,                                                  | 124,0  | 9                 | 9,6 Uncharacterized protein <a href="#">Danio rerio</a>                                                    |                                                          |
| B0R193_DANRE     | ubb {ECO:0000313 Ensembl:ENSADARP00000088354,                                                   | 82,8   | 9                 | 62,5 Uncharacterized protein <a href="#">Danio rerio</a>                                                   |                                                          |
| E7F16_DANRE      | eeef1g                                                                                          | 50,3   | 8                 | 27,1 Elongation factor 1-gamma <a href="#">Danio rerio</a>                                                 |                                                          |
| Q7ZV77_DANRE     | psma4 {ECO:0000313 EMBL:AAH45970.1,                                                             | 29,5   | 8                 | 37,5 Proteasome subunit alpha type <a href="#">Danio rerio</a>                                             |                                                          |
| B0S8K3_DANRE     | lrrc15 {ECO:0000313 Ensembl:ENSADARP00000095023,                                                | 63,0   | 8                 | 17,4 Uncharacterized protein <a href="#">Danio rerio</a>                                                   |                                                          |
| Q1MT36_DANRE     | anos1b {ECO:0000313 ZFIN:ZDB-GENE-000201-13}                                                    | 70,8   | 8                 | 2,1 Uncharacterized protein <a href="#">Danio rerio</a>                                                    |                                                          |
| Q9PFE1_DANRE     | myh14 {ECO:0000313 Ensembl:ENSADARP00000114445,                                                 | 81,3   | 8                 | 3,3 Uncharacterized protein <a href="#">Danio rerio</a>                                                    |                                                          |
| Q80SH5_DANRE     | rhoab {ECO:                                                                                     |        |                   |                                                                                                            |                                                          |

|                   |                                                               |  |       |     |                                                                                                                                |
|-------------------|---------------------------------------------------------------|--|-------|-----|--------------------------------------------------------------------------------------------------------------------------------|
| D1G156_DANRE      | actn3a                                                        |  | 103,6 | 7   | 8.1 Actn3a <a href="#">Danio rerio</a>                                                                                         |
| F1REH8_DANRE      | anxa13 {ECO:0000313 Ensembl:ENSNDARP00000016879,              |  | 35,2  | 7   | 28.5 Annexin <a href="#">Danio rerio</a>                                                                                       |
| Q6P93_DANRE       | hspa5                                                         |  | 72,0  | 7   | 13.2 Heat shock protein 5 <a href="#">Danio rerio</a>                                                                          |
| F1QY26_DANRE      | arvcbf {ECO:0000313 Ensembl:ENSNDARP00000082655,              |  | 102,9 | 7   | 12.6 Uncharacterized protein (Fragment) <a href="#">Danio rerio</a>                                                            |
| GB81_DANRE        | gnb1                                                          |  | 37,3  | 7   | 31.2 Guanine nucleotide-binding protein G(I)/G(S)/G(T) subunit beta-1 <a href="#">Danio rerio</a>                              |
| E7F46N_DANRE      | ano5a {ECO:0000313 Ensembl:ENSNDARP00000044452,               |  | 106,5 | 7   | 8.7 Anoctamin <a href="#">Danio rerio</a>                                                                                      |
| B3DP9_DANRE       | itgb3b {ECO:0000313 EMBL:AA163207.1,                          |  | 87,7  | 7   | 9.6 Integrin beta <a href="#">Danio rerio</a>                                                                                  |
| R4G02_DANRE       | sl:ch211-113a1.4.11 {ECO:0000313 Ensembl:ENSNDARP00000126712, |  | 27,1  | 7   | 34.7 Uncharacterized protein <a href="#">Danio rerio</a>                                                                       |
| EQ9U4_DANRE       | sl:ch211-264f5.6 {ECO:0000313 Ensembl:ENSNDARP00000115706,    |  | 58,3  | 7   | 16.7 Uncharacterized protein <a href="#">Danio rerio</a>                                                                       |
| E7F597_DANRE      | myo1c {ECO:0000313 Ensembl:ENSNDARP00000082359,               |  | 118,4 | 7   | 7.5 Unconventional myosin-1c <a href="#">Danio rerio</a>                                                                       |
| 1438A_DANRE       | ywhaba {ECO:0000313 Ensembl:ENSNDARP00000002359,              |  | 27,6  | 7   | 27.14-3-3 protein beta/alpha-A <a href="#">Danio rerio</a>                                                                     |
| F1QY51_DANRE      | sdk2b {ECO:0000313 Ensembl:ENSNDARP00000117666,               |  | 247,7 | 7   | 4.2 Uncharacterized protein <a href="#">Danio rerio</a>                                                                        |
| Q6TH32_DANRE      | cf11 {ECO:0000313 Ensembl:ENSNDARP00000023177,                |  | 18,8  | 6   | 46.1 Muscle cofilin 2 <a href="#">Danio rerio</a>                                                                              |
| Q7Z520_DANRE      | rab1ab {ECO:0000313 ZFIN:ZDB-GENE-030616-564}                 |  | 22,3  | 6   | 44.8 RAB1A, member RAS oncogene family <a href="#">Danio rerio</a>                                                             |
| F1Q8F0_DANRE      | itgb1b {ECO:0000313 Ensembl:ENSNDARP00000069745,              |  | 56,8  | 6   | 16.5 Integrin beta (Fragment) <a href="#">Danio rerio</a>                                                                      |
| F1QW15_DANRE      | gsna {ECO:0000313 Ensembl:ENSNDARP00000044077,                |  | 81,1  | 6   | 15.9 Uncharacterized protein <a href="#">Danio rerio</a>                                                                       |
| Q7Y72_DANRE       | pkma                                                          |  | 58,1  | 6   | 15.8 Pyruvate kinase <a href="#">Danio rerio</a>                                                                               |
| Q7T7CC_DANRE      | rab7 {ECO:0000313 EMBL:AAH54602.1,                            |  | 23,6  | 6   | 44.9 RAB7, member RAS oncogene family <a href="#">Danio rerio</a>                                                              |
| Q803M8_DANRE      | ywhaqb                                                        |  | 27,8  | 6   | 27.8 Tyrosine 3-monooxygenase/tryptophan 5-monooxygenase activation protein, zeta polypeptide <a href="#">Danio rerio</a>      |
| FERM2_DANRE       | fermt2                                                        |  | 78,5  | 6   | 13.6 Fermitin family homolog 2 <a href="#">Danio rerio</a>                                                                     |
| A3KPR4_DANRE      | wu:fe37d09                                                    |  | 11,4  | 6   | 38.8 Histone H4 <a href="#">Danio rerio</a>                                                                                    |
| Q6PH06_DANRE      | ilk {ECO:0000313 EMBL:AAH56593.1,                             |  | 51,1  | 6   | 18.8 Integrin linked kinase <a href="#">Danio rerio</a>                                                                        |
| LDB4A_DANRE       | ldha                                                          |  | 36,2  | 6   | 23.7 L-lactate dehydrogenase B-A chain <a href="#">Danio rerio</a>                                                             |
| F1RCV3_DANRE      | slh3 {ECO:0000313 Ensembl:ENSNDARP00000112770,                |  | 167,1 | 6   | 4.9 Uncharacterized protein <a href="#">Danio rerio</a>                                                                        |
| F1Q7V6_DANRE      | LOC795761 {ECO:0000313 Ensembl:ENSNDARP00000103692}           |  | 131,8 | 6   | 5.1 Uncharacterized protein <a href="#">Danio rerio</a>                                                                        |
| NRP1A_DANRE       | nrp1a                                                         |  | 102,5 | 6   | 9.3 Neuropilin-1a <a href="#">Danio rerio</a>                                                                                  |
| F1Q9R1_DANRE      | anxa11b {ECO:0000313 Ensembl:ENSNDARP00000019120,             |  | 51,5  | 6   | 16.1 Annexin <a href="#">Danio rerio</a>                                                                                       |
| BROX_DANRE        | brox                                                          |  | 46,1  | 5   | 20.2 BRO1 domain-containing protein BROX <a href="#">Danio rerio</a>                                                           |
| AZAN68_DANRE      | gdi1 {ECO:0000313 Ensembl:ENSNDARP00000111451,                |  | 50,5  | 5   | 14.1 Uncharacterized protein <a href="#">Danio rerio</a>                                                                       |
| Q7Z28_DANRE       | slc12a {ECO:0000313 Ensembl:ENSNDARP00000043003,              |  | 55,6  | 5   | 2.3 Amino acid transporter <a href="#">Danio rerio</a>                                                                         |
| Q803Q7_DANRE      | aldoa {ECO:0000313 EMBL:AAH44379.1,                           |  | 39,7  | 5   | 22.8 Fructose-bisphosphate aldolase <a href="#">Danio rerio</a>                                                                |
| Q6PH8_DANRE       | tktb {ECO:0000313 Ensembl:ENSNDARP00000017569,                |  | 67,8  | 5   | 12.2 Tkt protein <a href="#">Danio rerio</a>                                                                                   |
| Q5WYU2_DANRE      | cdc42 {ECO:0000313 Ensembl:ENSNDARP00000053431,               |  | 21,4  | 5   | 42.4 Ras-like protein Cdc42a <a href="#">Danio rerio</a>                                                                       |
| Q6PFU4_DANRE      | cdc42 {ECO:0000313 EMBL:AAH57415.1,                           |  | 21,3  | 5   | 42.4 Cell division cycle 42 <a href="#">Danio rerio</a>                                                                        |
| Q5K1D1_DANRE      | cd151 {ECO:0000313 EMBL:AAH83372.1,                           |  | 28,0  | 5   | 17.1 Tetraspanin <a href="#">Danio rerio</a>                                                                                   |
| Q6P9M5_DANRE      | DKEY238C7.11 {ECO:0000313 EMBL:CAM56630.1,                    |  | 20,4  | 5   | 30.7 Rac1 <a href="#">Danio rerio</a>                                                                                          |
| Q7Z529_DANRE      | rac1a {ECO:0000313 Ensembl:ENSNDARP00000096950,               |  | 21,5  | 5   | 5.7 Rac1 <a href="#">Danio rerio</a>                                                                                           |
| E7F128_DANRE      | slc44a2 {ECO:0000313 Ensembl:ENSNDARP00000109007,             |  | 80,9  | 5   | 7.8 Choline transporter-like protein 2 <a href="#">Danio rerio</a>                                                             |
| Q7T3D5_DANRE      | pdcd6 {ECO:0000313 EMBL:AAH53162.1,                           |  | 21,9  | 5   | 43.2 Programmed cell death 6 <a href="#">Danio rerio</a>                                                                       |
| F1R514_DANRE      | tubb6 {ECO:0000313 Ensembl:ENSNDARP00000072503,               |  | 24,5  | 5   | 20.5 Uncharacterized protein <a href="#">Danio rerio</a>                                                                       |
| A2BHD8_DANRE      | hexb {ECO:0000313 Ensembl:ENSNDARP00000050270,                |  | 61,5  | 5   | 12 Beta-hexosaminidase <a href="#">Danio rerio</a>                                                                             |
| HG6X78_DANRE      | -                                                             |  | 49,6  | 5   | 17.4 Uncharacterized protein (Fragment) <a href="#">Danio rerio</a>                                                            |
| CSU3E1_DANRE      | rab11a {ECO:0000313 EMBL:AAH55851.1,                          |  | 44,3  | 5   | 24.7 Novel protein similar to vertebrate ADP-ribosylation factor 4 (ARF4) (Zgc:77650) <a href="#">Danio rerio</a>              |
| RAN_DANRE         | ran                                                           |  | 24,5  | 5   | 31.2 GTP-binding nuclear protein Ran <a href="#">Danio rerio</a>                                                               |
| K2C8_DANRE        | krt8                                                          |  | 57,8  | 5   | 5.8 Keratin, type II cytoskeletal 8 <a href="#">Danio rerio</a>                                                                |
| F8W2W2_DANRE      | kpnb1 {ECO:0000313 Ensembl:ENSNDARP00000124587,               |  | 97,5  | 5   | 7.3 Uncharacterized protein <a href="#">Danio rerio</a>                                                                        |
| B056D0_DANRE      | nrb2b {ECO:0000313 EMBL:AA163576.1,                           |  | 102,6 | 5   | 6.5 Neuropilin 2b <a href="#">Danio rerio</a>                                                                                  |
| F1RAG3_DANRE      | nid1a {ECO:0000313 Ensembl:ENSNDARP00000090249,               |  | 141,7 | 5   | 5.8 Uncharacterized protein (Fragment) <a href="#">Danio rerio</a>                                                             |
| F1Q693_DANRE      | psmd1 {ECO:0000313 Ensembl:ENSNDARP00000006823,               |  | 99,5  | 5   | 8.1 Uncharacterized protein <a href="#">Danio rerio</a>                                                                        |
| F1Q0D7_DANRE      | -                                                             |  | 44,9  | 5   | 14.8 Uncharacterized protein (Fragment) <a href="#">Danio rerio</a>                                                            |
| F1Q250_DANRE      | ahnak {ECO:0000313 Ensembl:ENSNDARP00000082917,               |  | 685,2 | 5   | 0.8 Uncharacterized protein <a href="#">Danio rerio</a>                                                                        |
| F1QXV8_DANRE      | pgk1 {ECO:0000313 Ensembl:ENSNDARP00000070807,                |  | 44,7  | 5   | 18 Phosphoglycerate kinase <a href="#">Danio rerio</a>                                                                         |
| B8IHR9_DANRE      | kpnb3 {ECO:0000313 Ensembl:ENSNDARP00000058875,               |  | 122,7 | 5   | 5.9 Uncharacterized protein <a href="#">Danio rerio</a>                                                                        |
| E9QCW9_DANRE      | -                                                             |  | 145,1 | 5   | 5.1 Uncharacterized protein <a href="#">Danio rerio</a>                                                                        |
| F1R671_DANRE      | egfra {ECO:0000313 Ensembl:ENSNDARP00000121251,               |  | 83,4  | 5   | 10.1 Uncharacterized protein <a href="#">Danio rerio</a>                                                                       |
| F1Q1L4_DANRE      | finch {ECO:0000313 Ensembl:ENSNDARP00000024947,               |  | 194,6 | 5   | 1.5 Uncharacterized protein (Fragment) <a href="#">Danio rerio</a>                                                             |
| PLXA3_DANRE       | plxna3                                                        |  | 211,7 | 5   | 2.7 Plexin A3 <a href="#">Danio rerio</a>                                                                                      |
| E7F7L7_DANRE      | itga8 {ECO:0000313 Ensembl:ENSNDARP00000059037,               |  | 117,9 | 5   | 5.8 Uncharacterized protein <a href="#">Danio rerio</a>                                                                        |
| F1R8U0_DANRE      | krt94 {ECO:0000313 ZFIN:ZDB-GENE-061027-116}                  |  | 47,8  | 5   | 6.3 Uncharacterized protein <a href="#">Danio rerio</a>                                                                        |
| F1R704_DANRE      | f2 {ECO:0000313 Ensembl:ENSNDARP00000104071,                  |  | 61,2  | 4   | 3 Uncharacterized protein <a href="#">Danio rerio</a>                                                                          |
| O93423_DANRE      | stom {ECO:0000313 Ensembl:ENSNDARP00000010282,                |  | 31,6  | 4   | 28.2 Stomatin <a href="#">Danio rerio</a>                                                                                      |
| F1Q1U0_DANRE      | sl:dkey-9123.11 {ECO:0000313 Ensembl:ENSNDARP00000123613}     |  | 49,5  | 4   | 4.9 Uncharacterized protein <a href="#">Danio rerio</a>                                                                        |
| Q803T5_DANRE      | abcy                                                          |  | 48,0  | 4   | 13.2 Adenosylhomocysteinase <a href="#">Danio rerio</a>                                                                        |
| G3P_DANRE         | gapdh                                                         |  | 35,8  | 4   | 13.2 Glyceraldehyde-3-phosphate dehydrogenase <a href="#">Danio rerio</a>                                                      |
| Q7ZUQ1_DANRE      | cdc42l {ECO:0000313 EMBL:AAH48035.1,                          |  | 21,3  | 4   | 36.6 Cdc42l protein <a href="#">Danio rerio</a>                                                                                |
| Q6D681_DANRE      | pl3 {ECO:0000313 EMBL:AAH76470.1,                             |  | 70,1  | 4   | 10 Plastin 3 (T isoform) <a href="#">Danio rerio</a>                                                                           |
| OX1_DANRE         | gja1                                                          |  | 43,5  | 4   | 17.1 Gap junction alpha-1 protein <a href="#">Danio rerio</a>                                                                  |
| Q6D6J6_DANRE      | prdx2                                                         |  | 21,9  | 4   | 31 Peroxidoxin 2 <a href="#">Danio rerio</a>                                                                                   |
| Q803J3_DANRE      | rab2a                                                         |  | 23,5  | 4   | 26.4 RAB2A, member RAS oncogene family <a href="#">Danio rerio</a>                                                             |
| F1Q0T3_DANRE      | lims1 {ECO:0000313 Ensembl:ENSNDARP00000035109,               |  | 38,3  | 4   | 13.1 Uncharacterized protein <a href="#">Danio rerio</a>                                                                       |
| E7EXK6_DANRE      | cnp {ECO:0000313 Ensembl:ENSNDARP00000098561,                 |  | 46,5  | 4   | 17.5 Uncharacterized protein <a href="#">Danio rerio</a>                                                                       |
| ALDCB_DANRE       | aldocb                                                        |  | 39,3  | 4   | 19 Fructose-bisphosphate aldolase C-B <a href="#">Danio rerio</a>                                                              |
| F1R515_DANRE      | acyb {ECO:0000313 Ensembl:ENSNDARP00000072500,                |  | 120,1 | 4   | 4.5 Uncharacterized protein (Fragment) <a href="#">Danio rerio</a>                                                             |
| Q6PH25_DANRE      | vps28 {ECO:0000313 EMBL:AAH56741.1,                           |  | 25,4  | 4   | 21.5 Uncharacterized protein <a href="#">Danio rerio</a>                                                                       |
| ASPMV7_DANRE      | ppp2r1a {ECO:0000313 Ensembl:ENSNDARP00000117066,             |  | 65,4  | 4   | 11.7 Uncharacterized protein <a href="#">Danio rerio</a>                                                                       |
| Q7ZUP5_DANRE      | gna15 {ECO:0000313 EMBL:AAH48042.2,                           |  | 44,5  | 4   | 15.3 DnaJ (Hsp40) homolog, subfamily A, member 2 <a href="#">Danio rerio</a>                                                   |
| Q7T3D3_DANRE      | gna11 {ECO:0000313 EMBL:AAH53164.1,                           |  | 40,3  | 4   | 11.1 Guanine nucleotide binding protein (G protein), alpha inhibiting activity polypeptide 1 <a href="#">Danio rerio</a>       |
| F1R2A3_DANRE      | pkpa {ECO:0000313 Ensembl:ENSNDARP00000121464,                |  | 35,8  | 4   | 17.1 Uncharacterized protein (Fragment) <a href="#">Danio rerio</a>                                                            |
| Q6PH46_DANRE      | cct4 {ECO:0000313 EMBL:AAH56719.1,                            |  | 57,0  | 4   | 9.4 T-complex protein 1 subunit delta <a href="#">Danio rerio</a>                                                              |
| F1Q570_DANRE      | ctnnd1 {ECO:0000313 Ensembl:ENSNDARP00000097731,              |  | 100,0 | 4   | 4.8 Uncharacterized protein (Fragment) <a href="#">Danio rerio</a>                                                             |
| F8W522_DANRE      | hspa4a {ECO:0000313 Ensembl:ENSNDARP00000123727,              |  | 60,8  | 4   | 11.1 Uncharacterized protein <a href="#">Danio rerio</a>                                                                       |
| F1R765_DANRE      | fln1c {ECO:0000313 Ensembl:ENSNDARP00000091449,               |  | 58,4  | 4   | 10.1 Fibulin-1 <a href="#">Danio rerio</a>                                                                                     |
| F1R598_DANRE      | nid1a {ECO:0000313 Ensembl:ENSNDARP00000119891,               |  | 33,9  | 4   | 8.5 Uncharacterized protein (Fragment) <a href="#">Danio rerio</a>                                                             |
| EQ9BL8_DANRE      | dip2a {ECO:0000313 Ensembl:ENSNDARP00000114211,               |  | 154,2 | 4   | 3 Uncharacterized protein <a href="#">Danio rerio</a>                                                                          |
| Q5RKP9_DANRE      | gna11b {ECO:0000313 Ensembl:ENSNDARP00000044410,              |  | 42,0  | 4   | 10.9 Uncharacterized protein <a href="#">Danio rerio</a>                                                                       |
| Q7ZWR2_DANRE      | gnaia {ECO:0000313 EMBL:AAH49537.1,                           |  | 43,7  | 4   | 10.9 Guanine nucleotide binding protein (G protein), alpha inhibiting activity polypeptide a <a href="#">Danio rerio</a>       |
| Q5TYT1_DANRE      | nrcaia {ECO:0000313 Ensembl:ENSNDARP00000112170,              |  | 142,3 | 4   | 4.7 Uncharacterized protein <a href="#">Danio rerio</a>                                                                        |
| Q5R4A5_DANRE      | dcn {ECO:0000313 Ensembl:ENSNDARP00000112310,                 |  | 41,2  | 4   | 13.4 Uncharacterized protein <a href="#">Danio rerio</a>                                                                       |
| F1QW67_DANRE      | npc1 {ECO:0000313 Ensembl:ENSNDARP00000094372,                |  | 342,7 | 4   | 4.4 Uncharacterized protein <a href="#">Danio rerio</a>                                                                        |
| 1438B_DANRE       | ywhabb                                                        |  | 27,4  | 4   | 17.8 14-3-3 protein beta/alpha-B <a href="#">Danio rerio</a>                                                                   |
| B8A4A5_DANRE      | slc44a1a {ECO:0000313 Ensembl:ENSNDARP00000121604,            |  | 71,9  | 4   | 9.5 Uncharacterized protein <a href="#">Danio rerio</a>                                                                        |
| E7FC4A_DANRE      | ror2 {ECO:0000313 Ensembl:ENSNDARP00000101065,                |  | 105,0 | 4   | 6.5 Tyrosine-protein kinase transmembrane receptor <a href="#">Danio rerio</a>                                                 |
| Q6P102_DANRE      | ywhabl                                                        |  | 27,9  | 4   | 20.4 Tyrosine 3-monooxygenase/tryptophan 5-monooxygenase activation protein, beta polypeptide like <a href="#">Danio rerio</a> |
| F1R809_DANRE      | fn1b {ECO:0000313 Ensembl:ENSNDARP0000005796,                 |  | 265,7 | 4   | 1.9 Uncharacterized protein <a href="#">Danio rerio</a>                                                                        |
| F1Q5V7_DANRE      | iars {ECO:0000313 Ensembl:ENSNDARP00000091449,                |  | 145,1 | 4   | 4.6 Uncharacterized protein (Fragment) <a href="#">Danio rerio</a>                                                             |
| F1R822_DANRE      | LOC101882115 {ECO:0000313 Ensembl:ENSNDARP00000087948}        |  | 19,8  | 4   | 27.6 Uncharacterized protein <a href="#">Danio rerio</a>                                                                       |
| F1QRM9_DANRE      | npepps {ECO:0000313 Ensembl:ENSNDARP00000122475,              |  | 103,9 | 4   | 5.5 Uncharacterized protein <a href="#">Danio rerio</a>                                                                        |
| F1QY34_DANRE      | lrp1ab {ECO:0000313 ZFIN:ZDB-GENE-030131-7126}                |  | 508,8 | 4   | 0.9 Uncharacterized protein <a href="#">Danio rerio</a>                                                                        |
| Q5T268_DANRE      | cacna2d1a {ECO:0000313 Ensembl:ENSNDARP00000027410,           |  | 121,4 | 4   | 4.2 Uncharacterized protein <a href="#">Danio rerio</a>                                                                        |
| F1Q1K2_DANRE      | sl:ch211-225b1.1.1 {ECO:0000313 Ensembl:ENSNDARP00000089453,  |  | 67,9  | 3   | 7.2 Transporter <a href="#">Danio rerio</a>                                                                                    |
| F1Q1Q9_DANRE      | casika {ECO:0000313 Ensembl:ENSNDARP00000040842,              |  | 102,0 | 3   | 4.1 Uncharacterized protein (Fragment) <a href="#">Danio rerio</a>                                                             |
| Q803W5_DANRE      | sl:ch211-941f9.4 {ECO:0000313 EMBL:AAH4160.1,                 |  | 22,4  | 3   | 4.4 Transgelin <a href="#">Danio rerio</a>                                                                                     |
| B8JUN6_DANRE      | ppiaa {ECO:0000313 Ensembl:ENSNDARP0000003641,                |  | 17,4  | 3   | 22.6 Peptidyl-prolyl cis-trans isomerase <a href="#">Danio rerio</a>                                                           |
| E7FFR1_DANRE      | comp {ECO:0000313 ZFIN:ZDB-GENE-060606-1}                     |  | 82,1  | 3   | 4.8 Uncharacterized protein <a href="#">Danio rerio</a>                                                                        |
| Q7ZVA4_DANRE      | s100a10b {ECO:0000313 EMBL:AAH45941.1,                        |  | 11,2  | 3   | 31 Protein S100 <a href="#">Danio rerio</a>                                                                                    |
| Q5CZ11_DANRE      | ywhae2                                                        |  | 28,9  | 3   | 14.5 Tyrosine 3-monooxygenase/tryptophan 5-monooxygenase activation protein, epsilon polypeptide <a href="#">Danio rerio</a>   |
| Q6ZA24_DANRE      | kras {ECO:0000313 EMBL:AAH78646.1,                            |  | 21,4  | 3   | 20.2 K-ras <a href="#">Danio rerio</a>                                                                                         |
| TS4H8_DANRE       | thbs4b                                                        |  | 104,0 | 3   | 4.2 Thrombospondin-4-8 <a href="#">Danio rerio</a>                                                                             |
| A6FYK4_DANRE      | rab2a {ECO:0000313 EMBL:AAH4160.1,                            |  | 23,6  | 3   | 19.8 RAB2a protein <a href="#">Danio rerio</a>                                                                                 |
| Q9DGL3_DANRE      | atp1b1a {ECO:0000313 EMBL:AAF98361.1,                         |  | 35,2  | 3   | 13.4 Na+/K+ ATPase beta subunit isoform 1 <a href="#">Danio rerio</a>                                                          |
| Q6P012_DANRE      | psma8                                                         |  | 28,1  | 3   | 19.1 Proteasome subunit alpha type <a href="#">Danio rerio</a>                                                                 |
| HG9X84_DANRE      | zgc:112265 {ECO:0000313 Ensembl:ENSNDARP00000037689}          |  | 46,1  | 3   | 3.1 Uncharacterized protein (Fragment) <a href="#">Danio rerio</a>                                                             |
| F1QHE3_DANRE      | slc38a5a {ECO:0000313 Ensembl:ENSNDARP00000062384,            |  | 54,4  | 3   | 9.8 Uncharacterized protein <a href="#">Danio rerio</a>                                                                        |
| Q6TNT8_DANRE      | gna12a {ECO:0000313 Ensembl:ENSNDARP00000106050,              |  | 40,8  | 3   | 11.5 Guanine nucleotide binding protein (G protein), alpha inhibiting activity polypeptide 2 <a href="#">Danio rerio</a>       |
| E7F9A_DANRE       | sl:ch211-941f9.4 {ECO:0000313 Ensembl:ENSNDARP00000067761,    |  | 115,9 | 3   | 4.2 Uncharacterized protein (Fragment) <a href="#">Danio rerio</a>                                                             |
| F1QD15_DANRE      | LOC101883373 {ECO:0000313 Ensembl:ENSNDARP00000098616}        |  | 51,3  | 3   | 6.9 Uncharacterized protein (Fragment) <a href="#">Danio rerio</a>                                                             |
| LDB4A_DANRE       | ldha                                                          |  | 36,2  | 3   | 11.1 L-lactate dehydrogenase A chain <a href="#">Danio rerio</a>                                                               |
| F1QTT3_DANRE      | jupa {ECO:0000313 Ensembl:ENSNDARP00000026915,                |  | 80,0  | 3   | 5.8 Uncharacterized protein <a href="#">Danio rerio</a>                                                                        |
| F8W211_DANRE      | ankha {ECO:0000313 Ensembl:ENSNDARP000000124721,              |  | 30,3  | 3   | 13.5 Uncharacterized protein (Fragment) <a href="#">Danio rerio</a>                                                            |
| Q6Y8S2_DANRE      | cap1 {ECO:0000313 Ensembl:ENSNDARP00000020578,                |  | 49,4  | 3   | 9.5 Adenylyl cyclase-associated protein <a href="#">Danio rerio</a>                                                            |
| A0AG62_XJAS_DANRE | ywhae1 {ECO:0000313 Ensembl:ENSNDARP00000123116,              |  | 21,7  | 3   | 25.1 Uncharacterized protein <a href="#">Danio rerio</a>                                                                       |
| F1QF42_DANRE      | rab5ab                                                        |  | 19,6  | 3   | 23.1 Uncharacterized protein (Fragment) <a href="#">Danio rerio</a>                                                            |
| Q7ZUG4_DANRE      | h2afx                                                         |  | 23,5  | 3   | 16.7 RAB5A, member RAS oncogene family like <a href="#">Danio rerio</a>                                                        |
| H2AX_DANRE        | h2afx                                                         |  | 23,5  | 3   | 43 Histone H2AX <a href="#">Danio rerio</a>                                                                                    |
| Q7Y59_DANRE       | rap2b {ECO:0000313 EMBL:AAH54999.1,                           |  | 20,3  | 3   | 21.4 RAP2B, member of RAS oncogene family <a href="#">Danio rerio</a>                                                          |
| Q9DDU5_DANRE      | gstp1 {ECO:0000313 EMBL:AAI62358.1,                           |  | 23,5  | 3   | 23.6 Glutathione S-transferase pi <a href="#">Danio rerio</a>                                                                  |
| F1R028_DANRE      | g6c6313 {ECO:0000313 Ensembl:ENSNDARP00000112576,             |  | 58,2  | 3   | 6.2 Alpha-amylase <a href="#">Danio rerio</a>                                                                                  |
| SRG92_DANRE       | srp92                                                         |  | 123,6 | 3   | 3.8 SLIT-ROBO Rho GTPase-activating protein 2 <a href="#">Danio rerio</a>                                                      |
| F1Q1L4_DANRE      | itga11b {ECO:0000313 Ensembl:ENSNDARP00000024989,             |  | 129,9 | 3   | 4.1 Uncharacterized protein (Fragment) <a href="#">Danio rerio</a>                                                             |
| F1QFAW_DANRE      | LOC100331639 {ECO:0000313 Ensembl:ENSNDARP00000095998}        |  | 15,9  | 3   | 19.4 Uncharacterized protein <a href="#">Danio rerio</a>                                                                       |
| F1QHF1_DANRE      | LOC555957 {ECO:0000313 Ensembl:ENSNDARP0000000394}            |  | 108,1 | 3   | 3.9 Receptor protein-tyrosine kinase (Fragment) <a href="#">Danio rerio</a>                                                    |
| Q6D6X8_DANRE      | psma1 {ECO:0000313 Ensembl:ENSNDARP00000103895,               |  | 29,2  | 3   | 13.4 Proteasome subunit alpha type <a href="#">Danio rerio</a>                                                                 |
| Q90233_DANRE      | efnb1 {ECO:0000313 EMBL:AAI63323.1,                           |  | 37,8  | 3   | 12.6 Ephrin B1 <a href="#">Danio rerio</a>                                                                                     |
| B0Z17_DANRE       | enpp1 {ECO:0000313 Ensembl:ENSNDARP00000112341,               |  | 99,6  | 3   | 6 Slcch211-142e24.2 protein <a href="#">Danio rerio</a>                                                                        |
| R5SA_DANRE        | rpsa                                                          |  | 34,0  | 3</ |                                                                                                                                |

|              |                                                            |       |   |      |                                                                                                                     |
|--------------|------------------------------------------------------------|-------|---|------|---------------------------------------------------------------------------------------------------------------------|
| F1QZ45_DANRE | ap2a1 {ECO:0000313 Ensembl:ENSADARP00000070941,            | 104,4 | 3 | 3,2  | Uncharacterized protein (Fragment) <a href="#">Danio rerio</a>                                                      |
| F1R0S8_DANRE | ist1 {ECO:0000313 Ensembl:ENSADARP0000016734,              | 37,5  | 3 | 10,3 | Uncharacterized protein <a href="#">Danio rerio</a>                                                                 |
| Q1V1V2_DANRE | aars {ECO:0000251 HAMAP:RuleMF_03133                       | 106,9 | 3 | 9,7  | Alanine-tRNA ligase, cytoplasmic <a href="#">Danio rerio</a>                                                        |
| ESQW1T_DANRE | zgc1100868 {ECO:0000313 Ensembl:ENSADARP00000118878,       | 52,3  | 3 | 7,4  | Uncharacterized protein <a href="#">Danio rerio</a>                                                                 |
| Q7ZU96_DANRE | cct8 {ECO:0000313 EMBL:AAHS0492.1,                         | 59,3  | 3 | 6,2  | Cct8 protein <a href="#">Danio rerio</a>                                                                            |
| E7XW8_DANRE  | glg1a {ECO:0000313 Ensembl:ENSADARP00000081681,            | 119,7 | 3 | 3,5  | Uncharacterized protein <a href="#">Danio rerio</a>                                                                 |
| F1QSD6_DANRE | epha2a {ECO:0000313 Ensembl:ENSADARP00000011069,           | 109,2 | 3 | 3,7  | Receptor protein-tyrosine kinase <a href="#">Danio rerio</a>                                                        |
| F1QHK3_DANRE | postnb {ECO:0000313 Ensembl:ENSADARP0000011424,            | 82,9  | 3 | 6,6  | Uncharacterized protein <a href="#">Danio rerio</a>                                                                 |
| F1Q8K8_DANRE | ifg9 {ECO:0000313 ZFIN:ZDB-GENE-091204-177,                | 55,1  | 3 | 6,5  | Uncharacterized protein (Fragment) <a href="#">Danio rerio</a>                                                      |
| ASWW1Q_DANRE | zgc1100868 {ECO:0000313 Ensembl:ENSADARP00000021264,       | 48,9  | 3 | 3,4  | Uncharacterized protein <a href="#">Danio rerio</a>                                                                 |
| F1R108_DANRE | itga3a {ECO:0000313 Ensembl:ENSADARP00000055269,           | 115,6 | 3 | 4,3  | Uncharacterized protein <a href="#">Danio rerio</a>                                                                 |
| E7FFA5_DANRE | ace {ECO:0000313 Ensembl:ENSADARP00000099084,              | 152,8 | 3 | 2    | Uncharacterized protein <a href="#">Danio rerio</a>                                                                 |
| F1Q812_DANRE | fzd2 {ECO:0000313 Ensembl:ENSADARP00000071107,             | 61,7  | 3 | 6    | Uncharacterized protein <a href="#">Danio rerio</a>                                                                 |
| E9Q1C8_DANRE | farp1 {ECO:0000313 Ensembl:ENSADARP00000113717,            | 117,2 | 3 | 3,9  | Uncharacterized protein <a href="#">Danio rerio</a>                                                                 |
| B6E519_DANRE | plxna1b {ECO:0000313 ZFIN:ZDB-GENE-061007-11,              | 21,4  | 3 | 17,3 | Plexin A1a (Fragment) <a href="#">Danio rerio</a>                                                                   |
| F1QW63_DANRE | zgc1100868 {ECO:0000313 Ensembl:ENSADARP00000021264,       | 57,4  | 3 | 4,7  | Uncharacterized protein <a href="#">Danio rerio</a>                                                                 |
| F1Q6F9_DANRE | dyst1 {ECO:0000313 EMBL:AAI42847.1,                        | 119,0 | 3 | 1,8  | Uncharacterized protein <a href="#">Danio rerio</a>                                                                 |
| F1Q6D2_DANRE | fnn12a {ECO:0000313 Ensembl:ENSADARP00000114340,           | 60,2  | 3 | 7,5  | Uncharacterized protein (Fragment) <a href="#">Danio rerio</a>                                                      |
| X1WGZ7_DANRE | eprs {ECO:0000313 Ensembl:ENSADARP00000129506,             | 177,8 | 3 | 2,8  | Uncharacterized protein <a href="#">Danio rerio</a>                                                                 |
| F1QN93_DANRE | nrp2a {ECO:0000313 Ensembl:ENSADARP00000094545,            | 87,4  | 3 | 4,7  | Uncharacterized protein (Fragment) <a href="#">Danio rerio</a>                                                      |
| E7F5B3_DANRE | LOC568872 {ECO:0000313 Ensembl:ENSADARP00000099401,        | 123,5 | 3 | 3,7  | Anion exchange protein <a href="#">Danio rerio</a>                                                                  |
| COP8_DANRE   | copb1 {ECO:0000313 EMBL:AAQ63171.1},                       | 107,0 | 3 | 3,8  | Coatomer subunit beta <a href="#">Danio rerio</a>                                                                   |
| F1Q6F9_DANRE | glg1b {ECO:0000313 Ensembl:ENSADARP0000015877,             | 119,0 | 3 | 3,2  | Uncharacterized protein (Fragment) <a href="#">Danio rerio</a>                                                      |
| PCFRA_DANRE  | pdgfra                                                     | 118,2 | 3 | 3    | Platelet-derived growth factor receptor alpha <a href="#">Danio rerio</a>                                           |
| TMEM2_DANRE  | tmem2                                                      | 152,3 | 3 | 2,4  | Transmembrane protein 2 <a href="#">Danio rerio</a>                                                                 |
| E7F0Q4_DANRE | spaca4l {ECO:0000313 Ensembl:ENSADARP00000109164,          | 13,7  | 2 | 11,8 | Uncharacterized protein <a href="#">Danio rerio</a>                                                                 |
| Q6GQM9_DANRE | eno2                                                       | 46,8  | 2 | 7,4  | Eno2 protein <a href="#">Danio rerio</a>                                                                            |
| F1R824_DANRE | bsg {ECO:0000313 Ensembl:ENSADARP00000107195,              | 29,5  | 2 | 17,2 | Uncharacterized protein (Fragment) <a href="#">Danio rerio</a>                                                      |
| Q7U1M0_DANRE | whyaqa                                                     | 27,8  | 2 | 9    | Y tyrosine 3-monooxygenase/tryptophan 5-monooxygenase activation protein, theta polypeptide a                       |
| F1Q8W7_DANRE | eno3 {ECO:0000313 Ensembl:ENSADARP00000120742,             | 23,7  | 2 | 5,4  | Uncharacterized protein <a href="#">Danio rerio</a>                                                                 |
| F1R5X0_DANRE | pygb {ECO:0000313 Ensembl:ENSADARP0000025885,              | 97,4  | 2 | 3,4  | Alpha-1,4 glucan phosphorylase <a href="#">Danio rerio</a>                                                          |
| E7E2P9_DANRE | fh13a {ECO:0000313 Ensembl:ENSADARP00000050172,            | 32,0  | 2 | 7,9  | Uncharacterized protein <a href="#">Danio rerio</a>                                                                 |
| Q803P2_DANRE | tcp1                                                       | 60,2  | 2 | 5,9  | Tcp1 protein <a href="#">Danio rerio</a>                                                                            |
| F1R6H4_DANRE | hmgcs1 {ECO:0000313 Ensembl:ENSADARP00000121903,           | 57,0  | 2 | 5,6  | Uncharacterized protein <a href="#">Danio rerio</a>                                                                 |
| F1QWV0_DANRE | capn2a {ECO:0000313 Ensembl:ENSADARP00000114108,           | 67,6  | 2 | 4,4  | Uncharacterized protein (Fragment) <a href="#">Danio rerio</a>                                                      |
| ASPLC7_DANRE | rsb1b {ECO:0000313 Ensembl:ENSADARP00000123720,            | 23,7  | 2 | 1,9  | Rab8b protein <a href="#">Danio rerio</a>                                                                           |
| AK814_DANRE  | idh1 {ECO:0000313 EMBL:AAIS3922.1},                        | 46,9  | 2 | 6,3  | Isocitrate dehydrogenase [NADP] <a href="#">Danio rerio</a>                                                         |
| B0R011_DANRE | mmp14b {ECO:0000313 Ensembl:ENSADARP0000044263,            | 71,1  | 2 | 4,8  | Uncharacterized protein <a href="#">Danio rerio</a>                                                                 |
| F8W442_DANRE | gnao1a {ECO:0000313 Ensembl:ENSADARP00000124253,           | 40,3  | 2 | 7,6  | Uncharacterized protein <a href="#">Danio rerio</a>                                                                 |
| F1QWHD_DANRE | eva1bb {ECO:0000313 Ensembl:ENSADARP00000088338,           | 16,0  | 2 | 1,9  | Uncharacterized protein (Fragment) <a href="#">Danio rerio</a>                                                      |
| Q1L9H0_DANRE | cd9b {ECO:0000313 Ensembl:ENSADARP00000115141,             | 17,1  | 2 | 23,1 | Tetraspanin <a href="#">Danio rerio</a>                                                                             |
| E7FGW0_DANRE | ngfra {ECO:0000313 ZFIN:ZDB-GENE-050928-1},                | 37,4  | 2 | 12,4 | Uncharacterized protein <a href="#">Danio rerio</a>                                                                 |
| M812A_DANRE  | nvl2a                                                      | 29,8  | 2 | 1,2  | Multivesicular body subunit 12A <a href="#">Danio rerio</a>                                                         |
| F1QWY7_DANRE | pdgfra {ECO:0000313 Ensembl:ENSADARP00000094286,           | 70,2  | 2 | 9,4  | Platelet-derived growth factor receptor alpha <a href="#">Danio rerio</a>                                           |
| Q6ZM5Q_DANRE | capza1b {ECO:0000313 Ensembl:ENSADARP00000072971,          | 32,7  | 2 | 8,7  | Sidkcyf-16k6.1 <a href="#">Danio rerio</a>                                                                          |
| Q6D6V5_DANRE | rab10 {ECO:0000313 Ensembl:ENSADARP00000067775,            | 22,6  | 2 | 11,4 | Uncharacterized protein <a href="#">Danio rerio</a>                                                                 |
| RS8_DANRE    | rps8                                                       | 24,1  | 2 | 13,5 | 40S ribosomal protein S8 <a href="#">Danio rerio</a>                                                                |
| Q7ZU18_DANRE | zgc:55558 {ECO:0000313 EMBL:AAH48875.1},                   | 21,4  | 2 | 13,9 | Uncharacterized protein <a href="#">Danio rerio</a>                                                                 |
| F8W588_DANRE | pygl {ECO:0000313 Ensembl:ENSADARP00000123720,             | 98,2  | 2 | 3,9  | Alpha-1,4 glucan phosphorylase <a href="#">Danio rerio</a>                                                          |
| F6NPA4_DANRE | col5a1 {ECO:0000313 Ensembl:ENSADARP00000120854,           | 19,0  | 2 | 1,7  | Uncharacterized protein (Fragment) <a href="#">Danio rerio</a>                                                      |
| Q6NWH2_DANRE | marcks1b {ECO:0000313 Ensembl:ENSADARP00000051803,         | 21,0  | 2 | 17,4 | MARCKS-like 2 <a href="#">Danio rerio</a>                                                                           |
| A8E7N8_DANRE | psmb4 {ECO:0000313 Ensembl:ENSADARP00000117990,            | 28,4  | 2 | 16,4 | Proteasome subunit beta type <a href="#">Danio rerio</a>                                                            |
| Q6A3P5_DANRE | ndrg1a {ECO:0000313 Ensembl:ENSADARP00000044837,           | 43,6  | 2 | 7,7  | N-myc downstream regulated gene 1 protein, ndrg1 <a href="#">Danio rerio</a>                                        |
| Q568M0_DANRE | rras2 {ECO:0000313 EMBL:AAH92803.1},                       | 23,3  | 2 | 11,4 | Related RAS viral (R-ras) oncogene homolog 2 <a href="#">Danio rerio</a>                                            |
| Q8U158_DANRE | gpm6bb {ECO:0000313 Ensembl:ENSADARP00000080128,           | 29,5  | 2 | 7,5  | DMgamma2 <a href="#">Danio rerio</a>                                                                                |
| T5N3_DANRE   | tspsb1                                                     | 26,8  | 2 | 16,3 | Tetraspanin-9 <a href="#">Danio rerio</a>                                                                           |
| Q4V918_DANRE | psma3                                                      | 28,4  | 2 | 9,4  | Proteasome subunit alpha type <a href="#">Danio rerio</a>                                                           |
| Q499A0_DANRE | tmcd9 {ECO:0000313 EMBL:AAI00010.1},                       | 24,2  | 2 | 13   | Transmembrane emp24 protein transport domain containing 9 <a href="#">Danio rerio</a>                               |
| B0R171_DANRE | copb2 {ECO:0000313 EMBL:AAI60653.1},                       | 105,3 | 2 | 2    | Coatomer protein complex, subunit beta 2 <a href="#">Danio rerio</a>                                                |
| F1RAC7_DANRE | ano5b {ECO:0000313 Ensembl:ENSADARP00000013562,            | 19,6  | 2 | 16,8 | Uncharacterized protein (Fragment) <a href="#">Danio rerio</a>                                                      |
| H9GY3Q_DANRE | cul9 {ECO:0000313 Ensembl:ENSADARP00000102321},            | 87,9  | 2 | 3    | Uncharacterized protein <a href="#">Danio rerio</a>                                                                 |
| Q80K29_DANRE | ef14a1a                                                    | 46,3  | 2 | 7,9  | Eukaryotic translation initiation factor 4A, isoform 1A <a href="#">Danio rerio</a>                                 |
| E7F4K6_DANRE | pcdh2a16 {ECO:0000313 Ensembl:ENSADARP00000133616},        | 32,6  | 2 | 3,9  | Uncharacterized protein <a href="#">Danio rerio</a>                                                                 |
| E7E2F5_DANRE | sl:dkay-183c2.4 {ECO:0000313 ZFIN:ZDB-GENE-041210-121},    | 52,8  | 2 | 5,9  | Uncharacterized protein <a href="#">Danio rerio</a>                                                                 |
| AL11T1_DANRE | fam129ba {ECO:0000313 Ensembl:ENSADARP0000002973,          | 95,6  | 2 | 2,9  | Uncharacterized protein <a href="#">Danio rerio</a>                                                                 |
| Q6DHR6_DANRE | thop1 {ECO:0000313 Ensembl:ENSADARP00000046669,            | 78,0  | 2 | 3,2  | Uncharacterized protein <a href="#">Danio rerio</a>                                                                 |
| F1QE00_DANRE | -                                                          | 20,4  | 2 | 12,4 | Uncharacterized protein (Fragment) <a href="#">Danio rerio</a>                                                      |
| F1Q216_DANRE | gpla {ECO:0000313 Ensembl:ENSADARP00000009909,             | 62,1  | 2 | 8,3  | Glucose-6-phosphate isomerase <a href="#">Danio rerio</a>                                                           |
| W40D1_DANRE  | arf6a {ECO:0000313 Ensembl:ENSADARP00000069359},           | 40,2  | 2 | 8,3  | V-type proton ATPase subunit d 1 <a href="#">Danio rerio</a>                                                        |
| Q6P2U5_DANRE | pgam1a {ECO:0000313 EMBL:AAH56286.1},                      | 28,9  | 2 | 12   | Uncharacterized protein (Fragment) <a href="#">Danio rerio</a>                                                      |
| Q7S2R4_DANRE | pgam1a {ECO:0000313 EMBL:AAH56286.1},                      | 28,9  | 2 | 13   | Phosphoglycerate mutase 1a <a href="#">Danio rerio</a>                                                              |
| F8W412_DANRE | rplp0 {ECO:0000313 Ensembl:ENSADARP00000124178,            | 17,2  | 2 | 13,5 | 60S acidic ribosomal protein P0 <a href="#">Danio rerio</a>                                                         |
| Q5X173_DANRE | glipr2l {ECO:0000313 Ensembl:ENSADARP00000024304,          | 16,9  | 2 | 14,3 | Uncharacterized protein <a href="#">Danio rerio</a>                                                                 |
| E7F6P4_DANRE | -                                                          | 88,8  | 2 | 3,6  | Uncharacterized protein <a href="#">Danio rerio</a>                                                                 |
| Q6IQN5_DANRE | rac2 {ECO:0000313 EMBL:AAH71369.1},                        | 21,4  | 2 | 12,5 | Ras-related C3 botulinum toxin substrate 2 (Rho family, small GTP binding protein Rac2) <a href="#">Danio rerio</a> |
| B30K0_DANRE  | cct2 {ECO:0000313 Ensembl:ENSADARP00000056582,             | 33,0  | 2 | 4    | Chaperin subunit 7 (E1) <a href="#">Danio rerio</a>                                                                 |
| F1QN02_DANRE | nars {ECO:0000313 Ensembl:ENSADARP00000121524,             | 63,8  | 2 | 4,1  | Uncharacterized protein (Fragment) <a href="#">Danio rerio</a>                                                      |
| SERC5_DANRE  | serinc5                                                    | 52,0  | 2 | 4,6  | Serine incorporator 5 <a href="#">Danio rerio</a>                                                                   |
| E7F4Y8_DANRE | LOC100333057 {ECO:0000313 Ensembl:ENSADARP00000013839},    | 44,3  | 2 | 6,1  | Uncharacterized protein <a href="#">Danio rerio</a>                                                                 |
| F1Q5X8_DANRE | lpp {ECO:0000313 Ensembl:ENSADARP00000108886,              | 60,2  | 2 | 4,7  | Uncharacterized protein <a href="#">Danio rerio</a>                                                                 |
| Q7S726_DANRE | tspl1a {ECO:0000313 EMBL:AAH5151.1},                       | 31,6  | 2 | 9,8  | Uncharacterized protein <a href="#">Danio rerio</a>                                                                 |
| F1Q7X6_DANRE | ltbp3 {ECO:0000313 Ensembl:ENSADARP00000048106,            | 140,3 | 2 | 1,4  | Uncharacterized protein <a href="#">Danio rerio</a>                                                                 |
| F1R334_DANRE | psmd2 {ECO:0000313 Ensembl:ENSADARP00000107004,            | 55,3  | 2 | 4,7  | Uncharacterized protein (Fragment) <a href="#">Danio rerio</a>                                                      |
| Q6NVE1_DANRE | fgb {ECO:0000313 EMBL:AAH66629.1},                         | 50,4  | 2 | 2,1  | Fibrinogen, B beta polypeptide <a href="#">Danio rerio</a>                                                          |
| SND1_DANRE   | snd1                                                       | 104,5 | 2 | 2,7  | Staphylococcal nuclease domain-containing protein 1 <a href="#">Danio rerio</a>                                     |
| ASWW16_DANRE | pfm2l {ECO:0000313 Ensembl:ENSADARP00000053425,            | 15,0  | 2 | 25,2 | Profilin <a href="#">Danio rerio</a>                                                                                |
| F1R0Q1_DANRE | slc2a1b {ECO:0000313 Ensembl:ENSADARP00000167688,          | 53,6  | 2 | 7,3  | Uncharacterized protein <a href="#">Danio rerio</a>                                                                 |
| F1Q6E6_DANRE | tspl1b {ECO:0000313 Ensembl:ENSADARP00000039280,           | 133,8 | 2 | 9,2  | Uncharacterized protein <a href="#">Danio rerio</a>                                                                 |
| B8113_DANRE  | atrn {ECO:0000313 Ensembl:ENSADARP00000118575,             | 148,7 | 2 | 1,6  | Uncharacterized protein <a href="#">Danio rerio</a>                                                                 |
| F1R4Y8_DANRE | LOC100535166 {ECO:0000313 Ensembl:ENSADARP00000101569},    | 36,8  | 2 | 5,7  | Uncharacterized protein (Fragment) <a href="#">Danio rerio</a>                                                      |
| F1R067_DANRE | fnn13 {ECO:0000313 Ensembl:ENSADARP00000113078,            | 55,3  | 2 | 6,4  | Formin-like protein 3 (Fragment) <a href="#">Danio rerio</a>                                                        |
| B0SS64_DANRE | p4hb {ECO:0000313 Ensembl:ENSADARP00000093898,             | 56,6  | 2 | 3,9  | Protein disulfide-isomerase <a href="#">Danio rerio</a>                                                             |
| F1R2U4_DANRE | psma6a {ECO:0000313 Ensembl:ENSADARP00000046024,           | 25,9  | 2 | 10,3 | Proteasome subunit alpha type <a href="#">Danio rerio</a>                                                           |
| F1R0C3_DANRE | slc1a5 {ECO:0000313 Ensembl:ENSADARP00000039779,           | 53,6  | 2 | 7,4  | Amino acid transporter (Fragment) <a href="#">Danio rerio</a>                                                       |
| F1R931_DANRE | dipl2ca {ECO:0000313 ZFIN:ZDB-GENE-031118-39},             | 169,6 | 2 | 1,2  | Uncharacterized protein <a href="#">Danio rerio</a>                                                                 |
| F1R984_DANRE | ubr4 {ECO:0000313 Ensembl:ENSADARP00000034465,             | 568,3 | 2 | 0,4  | Uncharacterized protein (Fragment) <a href="#">Danio rerio</a>                                                      |
| F1R962_DANRE | -                                                          | 16,1  | 2 | 19,3 | Uncharacterized protein (Fragment) <a href="#">Danio rerio</a>                                                      |
| E7F9F1_DANRE | larsa {ECO:0000313 Ensembl:ENSADARP00000106738,            | 41,3  | 2 | 7,6  | Uncharacterized protein <a href="#">Danio rerio</a>                                                                 |
| F8W4C7_DANRE | emilin1b {ECO:0000313 Ensembl:ENSADARP00000124236,         | 116,8 | 2 | 2,2  | Uncharacterized protein <a href="#">Danio rerio</a>                                                                 |
| F1RCP0_DANRE | pk4kaa {ECO:0000313 Ensembl:ENSADARP00000100989,           | 236,9 | 2 | 1,4  | Uncharacterized protein <a href="#">Danio rerio</a>                                                                 |
| ASPM23_DANRE | scn1b {ECO:0000313 Ensembl:ENSADARP00000075639,            | 20,2  | 2 | 2,9  | Uncharacterized protein <a href="#">Danio rerio</a>                                                                 |
| E7F9M7_DANRE | LOC101884882 {ECO:0000313 Ensembl:ENSADARP00000079716},    | 63,5  | 2 | 6,3  | Uncharacterized protein <a href="#">Danio rerio</a>                                                                 |
| TRIO_DANRE   | trio                                                       | 342,4 | 2 | 0,7  | Triple functional domain protein <a href="#">Danio rerio</a>                                                        |
| Q6P8X2_DANRE | sar1b {ECO:0000313 Ensembl:ENSADARP00000009054,            | 22,2  | 2 | 11,6 | SAR1a gene homolog 2 (S. cerevisiae) <a href="#">Danio rerio</a>                                                    |
| H32_DANRE    | zgc:113984                                                 | 15,4  | 2 | 5,1  | Histone H3.2 <a href="#">Danio rerio</a>                                                                            |
| Q6P2T9_DANRE | cd63 {ECO:0000313 EMBL:AAH64300.1},                        | 25,8  | 1 | 10,5 | Tetraspanin <a href="#">Danio rerio</a>                                                                             |
| F1R8K3_DANRE | pkmb {ECO:0000313 Ensembl:ENSADARP000000017190,            | 58,3  | 1 | 3    | Pyruvate kinase <a href="#">Danio rerio</a>                                                                         |
| F1Q6E3_DANRE | scn1b {ECO:0000313 Ensembl:ENSADARP00000109999},           | 20,2  | 1 | 10   | Uncharacterized protein <a href="#">Danio rerio</a>                                                                 |
| F1Q1C9_DANRE | col1a1a {ECO:0000313 Ensembl:ENSADARP00000003177,          | 136,9 | 1 | 0,9  | Uncharacterized protein <a href="#">Danio rerio</a>                                                                 |
| E7EY18_DANRE | clec3ba {ECO:0000313 Ensembl:ENSADARP00000098343,          | 12,3  | 1 | 5,5  | Uncharacterized protein <a href="#">Danio rerio</a>                                                                 |
| ASW1U9_DANRE | sl:dkay-226m8.7 {ECO:0000313 Ensembl:ENSADARP00000121961}, | 22,8  | 1 | 12,3 | IFITM1 <a href="#">Danio rerio</a>                                                                                  |
| AZAR65_DANRE | rca2.1 {ECO:0000313 Ensembl:ENSADARP00000016148,           | 39,9  | 1 | 8,1  | Uncharacterized protein <a href="#">Danio rerio</a>                                                                 |
| F1R293_DANRE | adsl {ECO:0000313 Ensembl:ENSADARP00000022310,             | 54,6  | 1 | 2,3  | Adenylosuccinate lyase <a href="#">Danio rerio</a>                                                                  |
| Q8U1T4_DANRE | gpm6aa {ECO:0000313 EMBL:AAH64281.1},                      | 30,9  | 1 | 5    | Dhba1 <a href="#">Danio rerio</a>                                                                                   |
| F1Q6B3_DANRE | -                                                          | 24,0  | 1 | 14,1 | Uncharacterized protein (Fragment) <a href="#">Danio rerio</a>                                                      |
| F1QM89_DANRE | cd276 {ECO:0000313 Ensembl:ENSADARP00000033213,            | 32,7  | 1 | 4    | Uncharacterized protein <a href="#">Danio rerio</a>                                                                 |
| Q19U09_DANRE | itgb1b.2 {ECO:0000313 Ensembl:ENSADARP00000036611,         | 66,9  | 1 | 1,6  | Integrin beta <a href="#">Danio rerio</a>                                                                           |
| CATA_DANRE   | cat                                                        | 59,7  | 1 | 3    | Catalase <a href="#">Danio rerio</a>                                                                                |
| R4G622_DANRE | sl:ch211-132g1.3 {ECO:0000313 Ensembl:ENSADARP00000127057, | 29,9  | 1 | 4,8  | Uncharacterized protein (Fragment) <a href="#">Danio rerio</a>                                                      |
| F1R0C3_DANRE | trap1 {ECO:0000313 Ensembl:ENSADARP00000113030,            | 79,4  | 1 | 2    | Uncharacterized protein (Fragment) <a href="#">Danio rerio</a>                                                      |
| AKQNU5_DANRE | scn1b {ECO:0000313 Ensembl:ENSADARP00000009652,            | 248,0 | 1 | 8,2  | Claudin <a href="#">Danio rerio</a>                                                                                 |
| F1Q9P4_DANRE | napbb {ECO:0000313 Ensembl:ENSADARP00000106892,            | 33,1  | 1 | 3,7  | Uncharacterized protein <a href="#">Danio rerio</a>                                                                 |
| X1WGN9_DANRE | -                                                          | 113,2 | 1 | 2    | Kinesin-like protein <a href="#">Danio rerio</a>                                                                    |
| AK8C02_DANRE | cbr1l {ECO:0000313 Ensembl:ENSADARP00000024104,            | 30,7  | 1 | 5,4  | LOC792137 protein <a href="#">Danio rerio</a>                                                                       |
| TPM1_DANRE   | tpma                                                       | 32,0  | 1 | 4,6  | Tropomyosin alpha-1 chain <a href="#">Danio rerio</a>                                                               |
| Q6N724_DANRE | plscr3b {ECO:0000313 Ensembl:ENSADARP00000089774,          | 34,6  | 1 | 6,4  | Uncharacterized protein <a href="#">Danio rerio</a>                                                                 |
| XPD_DANRE    | csel1                                                      | 111,0 | 1 | 1,9  | Exportin-2 <a href="#">Danio rerio</a>                                                                              |
| F1Q4P4_DANRE | pola {ECO:0000313 ZFIN:ZDB-GENE-040724-232},               | 287,1 | 1 | 0,7  | Uncharacterized protein <a href="#">Danio rerio</a>                                                                 |
| Q6DHS3_DANRE | rpl15 {ECO:0000313 EMBL:AAH75894.1},                       | 24,1  | 1 | 7,8  | Ribosomal protein L15 <a href="#">Danio rerio</a>                                                                   |
| F1R429_DANRE | tm9sf4 {ECO:0000313 Ensembl:ENSADARP00000017789,           | 36,8  | 1 | 3,8  | Uncharacterized protein <a href="#">Danio rerio</a>                                                                 |
| F1QMR8_DANRE | -                                                          | 30,1  | 1 | 5,4  | Uncharacterized protein (Fragment) <a href="#">Danio rerio</a>                                                      |
| AKG25_DANRE  | vps37b {ECO:0000313 Ensembl:ENSADARP00000073103,           | 32,3  | 1 | 4,5  | Uncharacterized protein <a href="#">Danio rerio</a>                                                                 |
| Q6P099_DANRE | mar                                                        |       |   |      |                                                                                                                     |

|              |                                                            |       |   |      |                                                                                                          |
|--------------|------------------------------------------------------------|-------|---|------|----------------------------------------------------------------------------------------------------------|
| F1QB2P_DANRE | rab14l {ECO:0000313 Ensembl:ENSADARP0000050970,            | 23,9  | 1 | 7    | Uncharacterized protein <a href="#">Danio rerio</a>                                                      |
| Q6I0I6_DANRE | rpl11 {ECO:0000313 EMBL:AAH71420.1,                        | 20,4  | 1 | 7,9  | 60S ribosomal protein L11 <a href="#">Danio rerio</a>                                                    |
| Q6F919_DANRE | alpha {ECO:0000313 EMBL:AAH396.1.1,                        | 49,3  | 1 | 3,6  | Adenosyltransferase <a href="#">Danio rerio</a>                                                          |
| F1QW7M_DANRE | epha4a {ECO:0000313 Ensembl:ENSADARP0000089403,            | 110,3 | 1 | 1    | Receptor protein-tyrosine kinase <a href="#">Danio rerio</a>                                             |
| Q1LX82_DANRE | si:key-4219.6 {ECO:0000313 Ensembl:ENSADARP00000119549,    | 27,9  | 1 | 3,4  | Uncharacterized protein <a href="#">Danio rerio</a>                                                      |
| F1Q6Z7_DANRE | zgc:56064 {ECO:0000313 Ensembl:ENSADARP0000069926,         | 35,5  | 1 | 3,6  | Serine/threonine-protein phosphatase <a href="#">Danio rerio</a>                                         |
| F1R0J7_DANRE | flot1b {ECO:0000313 Ensembl:ENSADARP0000055380,            | 33,1  | 1 | 6,2  | Uncharacterized protein <a href="#">Danio rerio</a>                                                      |
| R4GEZ7_DANRE | psmc6 {ECO:0000313 Ensembl:ENSADARP00000127062,            | 20,9  | 1 | 7,7  | Uncharacterized protein <a href="#">Danio rerio</a>                                                      |
| F1QI03_DANRE | gna13b {ECO:0000313 Ensembl:ENSADARP0000036006,            | 44,2  | 1 | 2,9  | Uncharacterized protein <a href="#">Danio rerio</a>                                                      |
| ASPM33_DANRE | spmh2 {ECO:0000313 Ensembl:ENSADARP0000073253,             | 45,7  | 1 | 1,8  | Adenosylthioesterase <a href="#">Danio rerio</a>                                                         |
| BR1L13_DANRE | ywhaz {ECO:0000313 Ensembl:ENSADARP0000041959,             | 28,0  | 1 | 5,3  | Uncharacterized protein <a href="#">Danio rerio</a>                                                      |
| QS8EM0_DANRE | hha2a.1 {ECO:0000313 ZFIN:ZDB-GENE-050327-45}              | 35,6  | 1 | 4,3  | Uncharacterized protein <a href="#">Danio rerio</a>                                                      |
| Q8AW09_DANRE | ctsd                                                       | 43,2  | 1 | 2,8  | Ctsd protein <a href="#">Danio rerio</a>                                                                 |
| Q1LUB0_DANRE | ptp4a2b {ECO:0000313 Ensembl:ENSADARP00000121313,          | 17,1  | 1 | 12,5 | Uncharacterized protein <a href="#">Danio rerio</a>                                                      |
| OS7463_DANRE | npy8br {ECO:0000313 EMBL:AAI62788.1,                       | 42,1  | 1 | 6,4  | Neuropeptide Y /peptide YY receptor Yb <a href="#">Danio rerio</a>                                       |
| BOR028_DANRE | psmb5 {ECO:0000313 EMBL:CAQ14651.1,                        | 29,6  | 1 | 4,8  | Proteasome subunit beta type <a href="#">Danio rerio</a>                                                 |
| EQ9GUA_DANRE | psmb2 {ECO:0000313 EMBL:AAH75983.1,                        | 22,6  | 1 | 9,5  | Proteasome subunit beta type <a href="#">Danio rerio</a>                                                 |
| I9IT09_DANRE | pabpc1b {ECO:0000313 Ensembl:ENSADARP00000118006,          | 57,7  | 1 | 2,3  | Uncharacterized protein <a href="#">Danio rerio</a>                                                      |
| E7F957_DANRE | aqr {ECO:0000313 Ensembl:ENSADARP00000108091,              | 176,5 | 1 | 1,7  | Uncharacterized protein <a href="#">Danio rerio</a>                                                      |
| Q6PH00_DANRE | hgs {ECO:0000313 EMBL:AAH56769.1,                          | 50,1  | 1 | 2,7  | Hepatocyte growth factor-regulated tyrosine kinase substrate <a href="#">Danio rerio</a>                 |
| E7F3D8_DANRE | slc6a6b {ECO:0000313 Ensembl:ENSADARP0000064081,           | 56,0  | 1 | 3,4  | Transporter <a href="#">Danio rerio</a>                                                                  |
| F1QMK6_DANRE | zgc:92027 {ECO:0000313 Ensembl:ENSADARP0000024892,         | 22,9  | 1 | 6,3  | Uncharacterized protein <a href="#">Danio rerio</a>                                                      |
| Q6M9H9_DANRE | psmh2 {ECO:0000313 Ensembl:ENSADARP0000063661,             | 22,6  | 1 | 2,5  | Uncharacterized protein <a href="#">Danio rerio</a>                                                      |
| Q6PFT2_DANRE | c6 {ECO:0000313 EMBL:AAH57429.1,                           | 99,9  | 1 | 2,3  | C6 protein <a href="#">Danio rerio</a>                                                                   |
| Q81FB0_DANRE | acvr1l {ECO:0000313 EMBL:AAH53074.1,                       | 56,4  | 1 | 2,8  | Receptor protein serine/threonine kinase <a href="#">Danio rerio</a>                                     |
| Q7T2P2_DANRE | cct3                                                       | 60,3  | 1 | 2    | T-complex protein 1 subunit gamma <a href="#">Danio rerio</a>                                            |
| Q6NSN6_DANRE | ppp1caa {ECO:0000313 Ensembl:ENSADARP00000023260,          | 37,4  | 1 | 5,4  | Serine/threonine-protein phosphatase <a href="#">Danio rerio</a>                                         |
| Q6P6V0_DANRE | taldo1 {ECO:0000313 EMBL:AAH61957.1,                       | 37,9  | 1 | 10,4 | Transaldolase <a href="#">Danio rerio</a>                                                                |
| F1QF90_DANRE | LOC796454 {ECO:0000313 Ensembl:ENSADARP0000086433}         | 19,2  | 1 | 6,4  | Uncharacterized protein (Fragment) <a href="#">Danio rerio</a>                                           |
| F1R9A9_DANRE | serpinb1 {ECO:0000313 Ensembl:ENSADARP0000064419,          | 43,5  | 1 | 2,6  | Uncharacterized protein (Fragment) <a href="#">Danio rerio</a>                                           |
| BOLYKA_DANRE | kif5ba {ECO:0000313 Ensembl:ENSADARP00000115066,           | 97,0  | 1 | 1,4  | Kinesin-like protein <a href="#">Danio rerio</a>                                                         |
| F1QGA6_DANRE | ptptra {ECO:0000313 Ensembl:ENSADARP0000065585,            | 41,7  | 1 | 3,6  | Uncharacterized protein (Fragment) <a href="#">Danio rerio</a>                                           |
| F1QAB2_DANRE | -                                                          | 10,7  | 1 | 24,5 | Uncharacterized protein (Fragment) <a href="#">Danio rerio</a>                                           |
| Q5U373_DANRE | cab39l {ECO:0000313 EMBL:AAH85674.1,                       | 38,8  | 1 | 3    | Calcium binding protein 39-like <a href="#">Danio rerio</a>                                              |
| F1Q9C0_DANRE | nlgna2 {ECO:0000313 Ensembl:ENSADARP00000103229,           | 91,4  | 1 | 2,6  | Uncharacterized protein <a href="#">Danio rerio</a>                                                      |
| H9G1B1_DANRE | -                                                          | 19,8  | 1 | 7,2  | Uncharacterized protein <a href="#">Danio rerio</a>                                                      |
| F1QKSA_DANRE | canx {ECO:0000313 Ensembl:ENSADARP0000083454,              | 67,9  | 1 | 2,5  | Uncharacterized protein <a href="#">Danio rerio</a>                                                      |
| B7ZV28_DANRE | ptpn23b {ECO:0000313 Ensembl:ENSADARP00000111613,          | 134,0 | 1 | 1,4  | Sid:keyp-1149.2 protein <a href="#">Danio rerio</a>                                                      |
| F1QT85_DANRE | rpn1 {ECO:0000313 Ensembl:ENSADARP00000076844,             | 67,0  | 1 | 2,5  | Dolichyl-diphosphooligosaccharide-protein glycosyltransferase subunit 1 <a href="#">Danio rerio</a>      |
| Q5R8H9_DANRE | itih2 {ECO:0000313 Ensembl:ENSADARP0000066932,             | 106,3 | 1 | 1    | Uncharacterized protein <a href="#">Danio rerio</a>                                                      |
| F1Q883_DANRE | pgd {ECO:0000313 Ensembl:ENSADARP0000007588,               | 106,3 | 1 | 1,8  | 6-phosphogluconate dehydrogenase, decarboxylating <a href="#">Danio rerio</a>                            |
| F1QCV9_DANRE | mvb12ba {ECO:0000313 Ensembl:ENSADARP00000109861,          | 11,6  | 1 | 21,9 | Uncharacterized protein <a href="#">Danio rerio</a>                                                      |
| Q7T334_DANRE | psmh2 {ECO:0000313 Ensembl:ENSADARP0000063661,             | 22,6  | 1 | 2,5  | Uncharacterized protein <a href="#">Danio rerio</a>                                                      |
| Q6ZM34_DANRE | vps35 {ECO:0000313 Ensembl:ENSADARP0000003960,             | 91,5  | 1 | 2    | Uncharacterized protein <a href="#">Danio rerio</a>                                                      |
| Q6ZM62_DANRE | arpc3 {ECO:0000313 EMBL:AAH71479.1,                        | 20,5  | 1 | 6,2  | Actin-related protein 2/3 complex subunit 3 <a href="#">Danio rerio</a>                                  |
| F1QL90_DANRE | vaspb {ECO:0000313 ZFIN:ZDB-GENE-030131-7118}              | 10,7  | 1 | 21,9 | Uncharacterized protein (Fragment) <a href="#">Danio rerio</a>                                           |
| E7F666_DANRE | LOC566782 {ECO:0000313 Ensembl:ENSADARP00000112269}        | 94,4  | 1 | 1,1  | Uncharacterized protein <a href="#">Danio rerio</a>                                                      |
| A0U154_DANRE | rab6a {ECO:0000313 EMBL:AAI57380.1,                        | 23,5  | 1 | 5,3  | Rab6a protein <a href="#">Danio rerio</a>                                                                |
| Q6P300_DANRE | rps12                                                      | 22,9  | 1 | 7,4  | Ribosomal protein S5 <a href="#">Danio rerio</a>                                                         |
| Q80D05_DANRE | pfm2 {ECO:0000313 EMBL:AAH48368.1,                         | 19,2  | 1 | 10   | Pfm2 protein <a href="#">Danio rerio</a>                                                                 |
| Q4G5W0_DANRE | rtn4a {ECO:0000313 Ensembl:ENSADARP00000106859,            | 28,3  | 1 | 6,7  | Reticulon <a href="#">Danio rerio</a>                                                                    |
| AM1646_DANRE | parvab {ECO:0000313 Ensembl:ENSADARP0000027097,            | 42,0  | 1 | 3,8  | Uncharacterized protein <a href="#">Danio rerio</a>                                                      |
| CADH2_DANRE  | cdh2                                                       | 99,0  | 1 | 1,7  | Cadherin-2 <a href="#">Danio rerio</a>                                                                   |
| Q6PC53_DANRE | ppiab {ECO:0000313 Ensembl:ENSADARP0000061957,             | 17,5  | 1 | 6,1  | Peptidyl-prolyl cis-trans isomerase <a href="#">Danio rerio</a>                                          |
| Q5I2A9_DANRE | itga5 {ECO:0000313 EMBL:AAW56833.1,                        | 116,7 | 1 | 1,9  | Integrin alpha5 <a href="#">Danio rerio</a>                                                              |
| CT4_DANRE    | slc4a4                                                     | 80,9  | 1 | 1,1  | Choline transporter-like protein 4 <a href="#">Danio rerio</a>                                           |
| IBISA7_DANRE | caph5a {ECO:0000313 Ensembl:ENSADARP00000125775,           | 61,0  | 1 | 1,9  | Uncharacterized protein <a href="#">Danio rerio</a>                                                      |
| E7F948_DANRE | LOC10005536 {ECO:0000313 Ensembl:ENSADARP0000062944}       | 53,0  | 1 | 2,6  | Uncharacterized protein <a href="#">Danio rerio</a>                                                      |
| Q7T2E0_DANRE | cd82b {ECO:0000313 Ensembl:ENSADARP0000031244,             | 28,5  | 1 | 5,9  | Tetraspanin <a href="#">Danio rerio</a>                                                                  |
| Q6NV16_DANRE | cct5 {ECO:0000313 EMBL:AAH68037.1,                         | 59,4  | 1 | 3,1  | Chaperonin containing TCP1, subunit 5 (Epsilon) <a href="#">Danio rerio</a>                              |
| F1QJ75_DANRE | cyb5r1 {ECO:0000313 Ensembl:ENSADARP0000003519,            | 34,2  | 1 | 6,2  | NADH-cytochrome b5 reductase <a href="#">Danio rerio</a>                                                 |
| H8KZ22_DANRE | arpc4l                                                     | 19,7  | 1 | 4,8  | Actin related protein 2/3 complex, subunit 4 <a href="#">Danio rerio</a>                                 |
| ASPN58_DANRE | pxna {ECO:0000313 Ensembl:ENSADARP00000105494,             | 20,9  | 1 | 5,4  | Paxillin (Fragment) <a href="#">Danio rerio</a>                                                          |
| F1R7A1_DANRE | neol1 {ECO:0000313 ZFIN:ZDB-GENE-021031-1}                 | 156,8 | 1 | 0,7  | Uncharacterized protein <a href="#">Danio rerio</a>                                                      |
| Q5Q7Q3_DANRE | plxdc2 {ECO:0000313 ZFIN:ZDB-GENE-140106-69}               | 58,7  | 1 | 1,5  | Plexin domain containing 2 <a href="#">Danio rerio</a>                                                   |
| Q81HD0_DANRE | slc25a5                                                    | 32,8  | 1 | 4,4  | Solute carrier family 25 alpha, member 5 <a href="#">Danio rerio</a>                                     |
| F1R064_DANRE | -                                                          | 176,9 | 1 | 0,6  | Uncharacterized protein (Fragment) <a href="#">Danio rerio</a>                                           |
| F1R8G1_DANRE | lmpcp {ECO:0000313 Ensembl:ENSADARP0000005344,             | 114,4 | 1 | 1,2  | Uncharacterized protein <a href="#">Danio rerio</a>                                                      |
| F1R417_DANRE | sri1 {ECO:0000313 Ensembl:ENSADARP00000071819,             | 21,4  | 1 | 6,1  | Uncharacterized protein (Fragment) <a href="#">Danio rerio</a>                                           |
| BR1L23_DANRE | tspan14 {ECO:0000313 Ensembl:ENSADARP00000093003,          | 30,8  | 1 | 4,4  | Tetraspanin <a href="#">Danio rerio</a>                                                                  |
| Q6GQ17_DANRE | fh11a {ECO:0000313 Ensembl:ENSADARP0000096545,             | 34,2  | 1 | 3,4  | Fh1a protein <a href="#">Danio rerio</a>                                                                 |
| A3KPX2_DANRE | abcf1 {ECO:0000313 Ensembl:ENSADARP00000048976,            | 99,1  | 1 | 1,1  | Uncharacterized protein <a href="#">Danio rerio</a>                                                      |
| F1QUC3_DANRE | -                                                          | 88,2  | 1 | 1,3  | Uncharacterized protein (Fragment) <a href="#">Danio rerio</a>                                           |
| F1Q5Q0_DANRE | dsc2l {ECO:0000313 Ensembl:ENSADARP0000090832,             | 103,3 | 1 | 1,8  | Uncharacterized protein <a href="#">Danio rerio</a>                                                      |
| FRW5E3_DANRE | pax7a {ECO:0000313 Ensembl:ENSADARP00000123699,            | 21,9  | 1 | 5,1  | Uncharacterized protein <a href="#">Danio rerio</a>                                                      |
| D5T48_DANRE  | dstr4 {ECO:0000313 Ensembl:ENSADARP00000134663,            | 148,5 | 1 | 3,4  | Dolichyl-diphosphooligosaccharide-protein glycosyltransferase 48 kDa subunit <a href="#">Danio rerio</a> |
| EQ9HUS_DANRE | psmb6 {ECO:0000313 Ensembl:ENSADARP00000109775,            | 13,0  | 1 | 9    | Uncharacterized protein <a href="#">Danio rerio</a>                                                      |
| E7F0K5_DANRE | map3k7cl {ECO:0000313 ZFIN:ZDB-GENE-091204-239}            | 16,7  | 1 | 7,7  | Uncharacterized protein <a href="#">Danio rerio</a>                                                      |
| ARP2A_DANRE  | actr2a                                                     | 44,6  | 1 | 2,8  | Actin-related protein 2-A <a href="#">Danio rerio</a>                                                    |
| EQFZ77_DANRE | psma5 {ECO:0000313 Ensembl:ENSADARP00000113355,            | 21,3  | 1 | 5,1  | Proteasome subunit alpha type <a href="#">Danio rerio</a>                                                |
| E7F4F8_DANRE | slc:7h3-217n20.1 {ECO:0000313 Ensembl:ENSADARP00000110310, | 65,7  | 1 | 2,2  | Uncharacterized protein <a href="#">Danio rerio</a>                                                      |
| E7EN16_DANRE | myc2 {ECO:0000313 Ensembl:ENSADARP0000015170}              | 23,9  | 1 | 0,7  | Uncharacterized protein <a href="#">Danio rerio</a>                                                      |
| F1R7T7_DANRE | LOC794305 {ECO:0000313 Ensembl:ENSADARP00000107970}        | 91,0  | 1 | 2,1  | Uncharacterized protein (Fragment) <a href="#">Danio rerio</a>                                           |
| F1QLN6_DANRE | ca3.5 {ECO:0000313 ZFIN:ZDB-GENE-090311-30}                | 90,6  | 1 | 1    | Uncharacterized protein (Fragment) <a href="#">Danio rerio</a>                                           |
| E7F2N7_DANRE | CABZ01073085.1 {ECO:0000313 Ensembl:ENSADARP00000107538}   | 13,7  | 1 | 11,5 | Uncharacterized protein <a href="#">Danio rerio</a>                                                      |
| EQ9ET4_DANRE | tjp1a {ECO:0000313 Ensembl:ENSADARP000000114645,           | 181,4 | 1 | 1,2  | Uncharacterized protein <a href="#">Danio rerio</a>                                                      |
| H9GKX1_DANRE | zgc:112307 {ECO:0000313 Ensembl:ENSADARP00000097958}       | 99,0  | 1 | 1,5  | Uncharacterized protein <a href="#">Danio rerio</a>                                                      |
| EQ9C84_DANRE | ap2b1 {ECO:0000313 Ensembl:ENSADARP00000121218,            | 67,7  | 1 | 1,7  | AP complex subunit beta <a href="#">Danio rerio</a>                                                      |
| EQ9L17_DANRE | ralna {ECO:0000313 Ensembl:ENSADARP00000113463,            | 15,2  | 1 | 14,7 | Uncharacterized protein (Fragment) <a href="#">Danio rerio</a>                                           |
| F1Q9P9_DANRE | zgc:77086 {ECO:0000313 Ensembl:ENSADARP0000023877,         | 54,7  | 1 | 2,3  | Protein disulfide-isomerase <a href="#">Danio rerio</a>                                                  |
| F1R0N5_DANRE | adam9 {ECO:0000313 Ensembl:ENSADARP00000116793,            | 8,4   | 1 | 24,7 | Uncharacterized protein (Fragment) <a href="#">Danio rerio</a>                                           |
| H9GK4L_DANRE | LOC100330031 {ECO:0000313 Ensembl:ENSADARP00000081768}     | 96,5  | 1 | 1,5  | E3 ubiquitin-protein ligase <a href="#">Danio rerio</a>                                                  |
| F1R0X9_DANRE | LOC566921 {ECO:0000313 Ensembl:ENSADARP00000068721}        | 68,0  | 1 | 1,8  | Uncharacterized protein (Fragment) <a href="#">Danio rerio</a>                                           |
| Q2T7K0_DANRE | igf2r {ECO:0000313 Ensembl:ENSADARP00000061100,            | 271,3 | 1 | 0,5  | Cation-independent mannose 6-phosphate receptor <a href="#">Danio rerio</a>                              |
| EQ9F55_DANRE | postna {ECO:0000313 Ensembl:ENSADARP00000120855,           | 76,5  | 1 | 1,7  | Uncharacterized protein <a href="#">Danio rerio</a>                                                      |
| F1QAC2_DANRE | slc12a2 {ECO:0000313 Ensembl:ENSADARP00000112045,          | 93,5  | 1 | 1,5  | Uncharacterized protein (Fragment) <a href="#">Danio rerio</a>                                           |
| E7F533_DANRE | LOC568718 {ECO:0000313 Ensembl:ENSADARP00000044917}        | 108,9 | 1 | 1    | Receptor protein-tyrosine kinase <a href="#">Danio rerio</a>                                             |
| F1QKX8_DANRE | lamb2l {ECO:0000313 Ensembl:ENSADARP00000106594,           | 197,2 | 1 | 0,6  | Uncharacterized protein (Fragment) <a href="#">Danio rerio</a>                                           |
| F1QLV5_DANRE | sl00v2 {ECO:0000313 Ensembl:ENSADARP00000117991,           | 11,1  | 1 | 12   | Uncharacterized protein <a href="#">Danio rerio</a>                                                      |
| Q567N5_DANRE | rpl6 {ECO:0000313 EMBL:AAH93106.1,                         | 30,5  | 1 | 5,3  | Ribosomal protein L6 <a href="#">Danio rerio</a>                                                         |
| Q75P11_DANRE | capzb {ECO:0000313 EMBL:AAH55544.1,                        | 30,7  | 1 | 3,7  | Capping protein (Actin filament) muscle Z-line, beta <a href="#">Danio rerio</a>                         |
| F1QJVT_DANRE | gna13 {ECO:0000313 Ensembl:ENSADARP00000076519,            | 46,3  | 1 | 1,4  | Uncharacterized protein (Fragment) <a href="#">Danio rerio</a>                                           |
| Q6C258_DANRE | slc38a5b {ECO:0000313 Ensembl:ENSADARP00000004787,         | 52,6  | 1 | 3,4  | Slc38a3 protein <a href="#">Danio rerio</a>                                                              |
| AS2526_DANRE | rpl14 {ECO:0000313 EMBL:AAI53437.1,                        | 16,1  | 1 | 8,6  | Rpl14 protein <a href="#">Danio rerio</a>                                                                |
| F1RAS2_DANRE | -                                                          | 15,5  | 1 | 5,1  | Uncharacterized protein (Fragment) <a href="#">Danio rerio</a>                                           |
| FRW3B6_DANRE | cltc4 {ECO:0000313 Ensembl:ENSADARP00000124431,            | 23,9  | 1 | 5,6  | Chloride intracellular channel protein <a href="#">Danio rerio</a>                                       |
| E7E210_DANRE | plekhm1 {ECO:0000313 Ensembl:ENSADARP00000104442,          | 118,6 | 1 | 0,8  | Uncharacterized protein <a href="#">Danio rerio</a>                                                      |
| RS4K_DANRE   | rp4x                                                       | 29,7  | 1 | 3,4  | 40S ribosomal protein S4, X isoform <a href="#">Danio rerio</a>                                          |
| F1QJ66_DANRE | elc1bb {ECO:0000313 Ensembl:ENSADARP00000101986,           | 59,1  | 1 | 2,2  | Uncharacterized protein (Fragment) <a href="#">Danio rerio</a>                                           |
| F1R6M3_DANRE | bmp1a {ECO:0000313 Ensembl:ENSADARP00000112455,            | 114,0 | 1 | 1,3  | Metalloendopeptidase <a href="#">Danio rerio</a>                                                         |
| Q1LWHL_DANRE | rps16 {ECO:0000313 EMBL:AAI22272.1,                        | 16,4  | 1 | 6,8  | Ribosomal protein S16 <a href="#">Danio rerio</a>                                                        |
| F1QEY7_DANRE | atp6v0a1a {ECO:0000313 Ensembl:ENSADARP0000020867,         | 95,5  | 1 | 1,6  | V-type proton ATPase subunit a <a href="#">Danio rerio</a>                                               |
| FR4466_DANRE | spna2 {ECO:0000313 Ensembl:ENSADARP00000093027,            | 284,9 | 1 | 0,5  | Uncharacterized protein <a href="#">Danio rerio</a>                                                      |
| AC2E08_DANRE | man2a1 {ECO:0000313 Ensembl:ENSADARP00000123496,           | 125,2 | 1 | 1,7  | Alpha-mannosidase <a href="#">Danio rerio</a>                                                            |
| F1R902_DANRE | lamb1 {ECO:0000313 Ensembl:ENSADARP00000119168,            | 22,9  | 1 | 3,8  | Uncharacterized protein (Fragment) <a href="#">Danio rerio</a>                                           |
| F1QTM3_DANRE | slc:211-281g13.4 {ECO:0000313 Ensembl:ENSADARP0000097695,  | 85,0  | 1 | 2,2  | Uncharacterized protein (Fragment) <a href="#">Danio rerio</a>                                           |
| F1QDQ1_DANRE | copa {ECO:0000313 Ensembl:ENSADARP00000048276,             | 138,1 | 1 | 1,7  | Coatomer subunit alpha <a href="#">Danio rerio</a>                                                       |
| B05636_DANRE | si:keyp-67a8.2 {ECO:0000313 Ensembl:ENSADARP00000119007,   | 32,3  | 1 | 3,1  | Uncharacterized protein <a href="#">Danio rerio</a>                                                      |
| E7F701_DANRE | hyal2a {ECO:0000313 ZFIN:ZDB-GENE-131121-41}               | 54,7  | 1 | 3,4  | Hyaluronidase <a href="#">Danio rerio</a>                                                                |
| F1QJY1_DANRE | tspan35 {ECO:0000313 ZFIN:ZDB-GENE-040426-1362}            | 25,8  | 1 | 3,3  | Tetraspanin <a href="#">Danio rerio</a>                                                                  |
| CO962_DANRE  | copp2                                                      | 97,5  | 1 | 1,4  | Coatomer subunit gamma-2 <a href="#">Danio rerio</a>                                                     |
| Q8K0C8_DANRE | rhesb1 {ECO:0000313 Ensembl:ENSADARP00000055722,           | 100,7 | 1 | 3,8  | Uncharacterized protein (Fragment) <a href="#">Danio rerio</a>                                           |
| ASPF53_DANRE | arhgap35 {ECO:0000313 Ensembl:ENSADARP00000116993,         | 171,4 | 1 | 0,5  | Uncharacterized protein <a href="#">Danio rerio</a>                                                      |
| Q66H73_DANRE | fth1b {ECO:0000313 Ensembl:ENSADARP00000028465,            | 20,7  | 1 | 4    | Ferritin <a href="#">Danio rerio</a>                                                                     |
| JAG18_DANRE  | jag1b                                                      | 133,4 | 1 | 1,1  | Protein jagged-1b <a href="#">Danio rerio</a>                                                            |
| KDIS_DANRE   | kidins220                                                  | 185,1 | 1 | 0,6  | Kinase D-interacting substrate of 220 kDa <a href="#">Danio rerio</a>                                    |
| F6NUH4_DANRE | ano6 {ECO:0000313 Ensembl:ENSADARP00000123283,             | 101,5 | 1 | 1,8  | Anoctamin (Fragment) <a href="#">Danio rerio</a>                                                         |
| F1R9P8_DANRE | notch2 {ECO:0000313 Ensembl:ENSADARP00000029855,           | 267,4 | 1 | 0,4  | Uncharacterized protein <a href="#">Danio rerio</a>                                                      |
| E7F417_DANRE | pon5 {ECO:0000313 Ensembl:ENSADARP00000113816,             | 14,0  | 1 | 10,4 | Uncharacterized protein (Fragment) <a href="#">Danio rerio</a>                                           |
| EQ9DR6_DANRE | slc:211-183d21.1 {ECO:0000313 Ensembl:ENSADARP00000117730, | 97,8  | 1 | 1,4  | Uncharacterized protein <a href="#">Danio rerio</a>                                                      |
| Q7ZYX7_DANRE | psmd7 {ECO:                                                |       |   |      |                                                                                                          |

|                 |                                                            |       |   |      |                                                                        |
|-----------------|------------------------------------------------------------|-------|---|------|------------------------------------------------------------------------|
| Q7ZUD6_DANRE    | rtm3 {ECO:0000313 EMBL:AAH49315.1,                         | 24,5  | 1 | 5    | Reticulon <i>Danio rerio</i>                                           |
| Q7T180_DANRE    | hbbe2 {ECO:0000313 EMBL:AAI39603.1,                        | 16,5  | 1 | 6,8  | Embryonic globin beta e2 <i>Danio rerio</i>                            |
| X1W426_DANRE    | finbi {ECO:0000313 Ensembl:ENSADARP00000129535,            | 50,0  | 1 | 4,7  | Uncharacterized protein (Fragment) <i>Danio rerio</i>                  |
| BSA4H1_DANRE    | st:ch211-202h2.7 {ECO:0000313 Ensembl:ENSADARP00000103500, | 15,6  | 1 | 4,8  | Uncharacterized protein <i>Danio rerio</i>                             |
| E7EZL7_DANRE    | nme2b.2 {ECO:0000313 ZFIN:ZDB-GENE-000210-33}              | 17,0  | 1 | 5,9  | Nucleoside diphosphate kinase <i>Danio rerio</i>                       |
| F6NZP4_DANRE    | esyt1b {ECO:0000313 Ensembl:ENSADARP00000114008,           | 175,1 | 1 | 0,6  | Uncharacterized protein <i>Danio rerio</i>                             |
| F1R7U2_DANRE    | pvr12l {ECO:0000313 Ensembl:ENSADARP00000119945,           | 29,6  | 1 | 3,4  | Uncharacterized protein <i>Danio rerio</i>                             |
| GFRR3_DANRE     | -                                                          | 89,7  | 1 | 1,2  | Fibroblast growth factor receptor 3 <i>Danio rerio</i>                 |
| B0V3R7_DANRE    | serpind1 {ECO:0000313 Ensembl:ENSADARP00000073528,         | 58,2  | 1 | 1,4  | Uncharacterized protein <i>Danio rerio</i>                             |
| E7E7C7_DANRE    | st:ch211-181l7.2 {ECO:0000313 Ensembl:ENSADARP00000093559, | 72,1  | 1 | 2,7  | Uncharacterized protein <i>Danio rerio</i>                             |
| E9QHQ3_DANRE    | theg {ECO:0000313 ZFIN:ZDB-GENE-070912-59}                 | 9,8   | 1 | 9,5  | Uncharacterized protein <i>Danio rerio</i>                             |
| E7EZY3_DANRE    | CABZ01066502.1 {ECO:0000313 Ensembl:ENSADARP00000104356}   | 58,4  | 1 | 2,1  | Pyruvate kinase <i>Danio rerio</i>                                     |
| F1QF55_DANRE    | LOC553451 {ECO:0000313 Ensembl:ENSADARP00000089263}        | 164,1 | 1 | 0,8  | Uncharacterized protein <i>Danio rerio</i>                             |
| AA0G2KX66_DANRE | -                                                          | 28,5  | 1 | 5,2  | Uncharacterized protein <i>Danio rerio</i>                             |
| Q6TNW3_DANRE    | abce1 {ECO:0000313 Ensembl:ENSADARP00000011642,            | 67,3  | 1 | 2    | ATP-binding cassette, sub-family E (OABP), member 1 <i>Danio rerio</i> |
| E9CB24_DANRE    | fermt1 {ECO:0000313 Ensembl:ENSADARP00000116317,           | 76,0  | 1 | 1,4  | Uncharacterized protein <i>Danio rerio</i>                             |
| CHM19_DANRE     | chmp1b                                                     | 22,1  | 1 | 4    | Charged multivesicular body protein 1b <i>Danio rerio</i>              |
| AG03_DANRE      | ago3                                                       | 97,3  | 1 | 2    | Protein argonaute-3 <i>Danio rerio</i>                                 |
| B0SS84_DANRE    | mapre1a {ECO:0000313 Ensembl:ENSADARP00000113986,          | 15,3  | 1 | 5,3  | Uncharacterized protein <i>Danio rerio</i>                             |
| E7F9D3_DANRE    | LOC101885083 {ECO:0000313 Ensembl:ENSADARP00000106778}     | 64,9  | 1 | 2    | Uncharacterized protein <i>Danio rerio</i>                             |
| F1QN76_DANRE    | rpl18 {ECO:0000313 Ensembl:ENSADARP00000117845,            | 19,2  | 1 | 8,4  | Uncharacterized protein (Fragment) <i>Danio rerio</i>                  |
| R4GEY1_DANRE    | st:ch211-172.10 {ECO:0000313 Ensembl:ENSADARP00000127045,  | 44,5  | 1 | 1,8  | Uncharacterized protein (Fragment) <i>Danio rerio</i>                  |
| F8W246_DANRE    | rps13 {ECO:0000313 Ensembl:ENSADARP00000124858,            | 13,7  | 1 | 8,3  | Uncharacterized protein <i>Danio rerio</i>                             |
| R518_DANRE      | rps18                                                      | 17,7  | 1 | 5,3  | 40S ribosomal protein S18 <i>Danio rerio</i>                           |
| F1QUR3_DANRE    | pdia3 {ECO:0000313 Ensembl:ENSADARP00000026546,            | 51,1  | 1 | 2,4  | Protein disulfide-isomerase (Fragment) <i>Danio rerio</i>              |
| E7FE96_DANRE    | fryb {ECO:0000313 Ensembl:ENSADARP00000044293,             | 334,2 | 1 | 0,3  | Uncharacterized protein <i>Danio rerio</i>                             |
| F1Q8T8_DANRE    | cx35.4 {ECO:0000313 Ensembl:ENSADARP00000062916,           | 35,4  | 1 | 3,9  | Gap junction protein <i>Danio rerio</i>                                |
| F1R4C2_DANRE    | si:busm1-57f23.1 {ECO:0000313 Ensembl:ENSADARP00000001953, | 16,4  | 1 | 7,6  | Uncharacterized protein <i>Danio rerio</i>                             |
| I9ISQ2_DANRE    | tspan4b {ECO:0000313 Ensembl:ENSADARP00000125942,          | 12,4  | 1 | 1,3  | Uncharacterized protein <i>Danio rerio</i>                             |
| F8W520_DANRE    | zdihc5a {ECO:0000313 Ensembl:ENSADARP00000123808,          | 31,5  | 1 | 4,8  | Uncharacterized protein (Fragment) <i>Danio rerio</i>                  |
| E7FCN9_DANRE    | cspg4 {ECO:0000313 Ensembl:ENSADARP00000101583,            | 255,5 | 1 | 0,9  | Uncharacterized protein <i>Danio rerio</i>                             |
| Q1L925_DANRE    | aspm {ECO:0000313 Ensembl:ENSADARP00000108461,             | 394,2 | 1 | 0,2  | Uncharacterized protein <i>Danio rerio</i>                             |
| F1QE25_DANRE    | naa15a {ECO:0000313 Ensembl:ENSADARP00000015464,           | 100,9 | 1 | 1,5  | Uncharacterized protein <i>Danio rerio</i>                             |
| Q5BL99_DANRE    | dnl2l {ECO:0000313 EMBL:AAH90543.1}                        | 10,4  | 1 | 12,4 | Dnl2l protein <i>Danio rerio</i>                                       |
| X1WGM4_DANRE    | lama1 {ECO:0000313 Ensembl:ENSADARP00000129382,            | 39,8  | 1 | 1,9  | Uncharacterized protein (Fragment) <i>Danio rerio</i>                  |
| E7F1W5_DANRE    | gpcx {ECO:0000313 Ensembl:ENSADARP00000089863,             | 89,2  | 1 | 1,9  | Uncharacterized protein <i>Danio rerio</i>                             |
| Q5RHG8_DANRE    | cad {ECO:0000313 Ensembl:ENSADARP00000069746,              | 238,7 | 1 | 0,5  | Uncharacterized protein <i>Danio rerio</i>                             |
| Q6DRE6_DANRE    | rpl12 {ECO:0000313 Ensembl:ENSADARP00000009096,            | 17,7  | 1 | 5,5  | 60S ribosomal protein L12 <i>Danio rerio</i>                           |
| F1RAQ9_DANRE    | larsb {ECO:0000313 Ensembl:ENSADARP00000113140,            | 85,0  | 1 | 1,2  | Uncharacterized protein (Fragment) <i>Danio rerio</i>                  |
| F1QTQ0_DANRE    | man2b1 {ECO:0000313 Ensembl:ENSADARP00000014955,           | 111,5 | 1 | 0,8  | Alpha-mannosidase <i>Danio rerio</i>                                   |
| F6NLU6_DANRE    | ppib {ECO:0000313 Ensembl:ENSADARP00000069300,             | 22,9  | 1 | 3,8  | Peptidyl-prolyl cis-trans isomerase <i>Danio rerio</i>                 |
| F1Q9H9_DANRE    | mtor {ECO:0000313 Ensembl:ENSADARP00000069674,             | 286,1 | 1 | 0,6  | Uncharacterized protein <i>Danio rerio</i>                             |
| E7F428_DANRE    | st:ch211-233g6.3 {ECO:0000313 Ensembl:ENSADARP00000102427, | 29,4  | 1 | 2,3  | Uncharacterized protein <i>Danio rerio</i>                             |
| E9QH42_DANRE    | vps13d {ECO:0000313 Ensembl:ENSADARP00000122356,           | 236,4 | 1 | 0,3  | Uncharacterized protein <i>Danio rerio</i>                             |
| AZCER9_DANRE    | ankfy1 {ECO:0000313 Ensembl:ENSADARP00000118102,           | 127,6 | 1 | 1,5  | Uncharacterized protein <i>Danio rerio</i>                             |
| X1WC11_DANRE    | arhgdia {ECO:0000313 Ensembl:ENSADARP00000127753,          | 15,1  | 1 | 5,1  | Uncharacterized protein <i>Danio rerio</i>                             |
